# Supplementary material for: A diastereoselective synthesis of pyrano fused coumarins via organocatalytic three-component reaction
Source: Royal Society of Chemistry journal article supplement (doi:10.1039/c2ob26203g), 2012-11-07
Supplement: c2ob26203g.pdf [file c2ob26203g.pdf]

## Supporting Information

### A diastereoselective synthesis of pyrano fused coumarins via organocatalytic three-component reaction

Somayeh Ahadi, Mahdi Zolghadr, Hamid Reza Khavasi and Ayoob Bazgir\*  
*Department of Chemistry, Shahid Beheshti University G. C., P. O. Box 19396-4716, Tehran, Iran*  
[a\\_bazgir@sbu.ac.ir](mailto:a_bazgir@sbu.ac.ir)

#### Table of Contents

| Title                                                                                | Page  |
|--------------------------------------------------------------------------------------|-------|
| Title, author's name, address and table of contents                                  | 1     |
| General remarks and <b>FIGURE 1</b> .                                                | 2-3   |
| <b>FIGURE 2</b> . ORTEP diagram of <b>15</b>                                         | 4     |
| Copies of <sup>1</sup> H (300 MHz), <sup>13</sup> C NMR , Mass spectra for <b>4a</b> | 5-7   |
| Copies of <sup>1</sup> H (300 MHz) spectra for <b>4b</b>                             | 8     |
| Copies of <sup>1</sup> H (300 MHz), <sup>13</sup> C NMR, Mass spectra for <b>4c</b>  | 9-11  |
| Copies of <sup>1</sup> H (300 MHz), <sup>13</sup> C NMR spectra for <b>4d</b>        | 12-13 |
| Copies of <sup>1</sup> H (300 MHz), <sup>13</sup> C NMR, Mass spectra for <b>4e</b>  | 14-16 |
| Copies of <sup>1</sup> H (300 MHz), <sup>13</sup> C NMR, Mass spectra for <b>4f</b>  | 17-19 |
| Copies of <sup>1</sup> H (300 MHz), <sup>13</sup> C NMR spectra for <b>4g</b>        | 20-21 |
| Copies of <sup>1</sup> H (300 MHz), <sup>13</sup> C NMR, Mass spectra for <b>4h</b>  | 22-24 |
| Copies of <sup>1</sup> H (300 MHz), <sup>13</sup> C NMR spectra for <b>4i</b>        | 25-26 |
| Copies of <sup>1</sup> H (300 MHz), <sup>13</sup> C NMR spectra for <b>4j</b>        | 27-28 |
| Copies of <sup>1</sup> H (300 MHz), <sup>13</sup> C NMR, Mass spectra for <b>4k</b>  | 29-31 |
| Copies of <sup>1</sup> H (300 MHz), <sup>13</sup> C NMR spectra for <b>4l</b>        | 32-33 |
| Copies of <sup>1</sup> H (300 MHz), Mass spectra for <b>7a</b>                       | 34-35 |
| Copies of <sup>1</sup> H (300 MHz), Mass spectra for <b>7b</b>                       | 36-37 |
| Copies of <sup>1</sup> H (300 MHz), <sup>13</sup> C NMR, Mass spectra for <b>9a</b>  | 38-40 |
| Copies of <sup>1</sup> H (300 MHz), Mass spectra for <b>9b</b>                       | 41-42 |
| Copies of <sup>1</sup> H (300 MHz), <sup>13</sup> C NMR spectra for <b>9c</b>        | 43-44 |
| Copies of <sup>1</sup> H (300 MHz), <sup>13</sup> C NMR, mass spectra for <b>12a</b> | 45-47 |
| Copies of <sup>1</sup> H (300 MHz), <sup>13</sup> C NMR spectra for <b>12b</b>       | 48-49 |
| Copies of <sup>1</sup> H (300 MHz), <sup>13</sup> C NMR, Mass spectra for <b>12c</b> | 50-52 |
| Copies of <sup>1</sup> H (300 MHz) spectra for <b>12d</b>                            | 53    |
| Copies of <sup>1</sup> H (300 MHz) spectra for <b>12e</b>                            | 54    |
| Copies of <sup>1</sup> H (300 MHz), <sup>13</sup> C NMR spectra for <b>12f</b>       | 55-56 |
| Copies of NOE spectra for <b>4g</b> and <b>9a</b>                                    | 57-58 |

## Experimental Section

### General remarks:

Melting points were determined on a melting point apparatus and are uncorrected. IR spectra were taken with a FT/IR spectrophotometer.  $^1\text{H}$  NMR spectra were recorded on a 300 MHz spectrometer. Chemical shifts are expressed in parts per million downfield from tetramethylsilane as an internal standard.  $^{13}\text{C}$  NMR spectra were recorded on a 70 MHz spectrometer using broadband proton decoupling. Chemical shifts are expressed in parts per million using the middle resonance of DMSO as an internal standard. Elemental analyses for C, H and N performed using a Heraeus CHN–O– Rapid analyzer.

All chemicals were purchased from Merck or Aldrich and were used without further purification. Known 3-bromo-4-hydroxycoumarin was prepared by the procedure reported previously (Kotharkar, S. A.; Shinde, D. B. *Bioorg. Med. Chem. Lett.* **2006**, 16, 6181–6184).

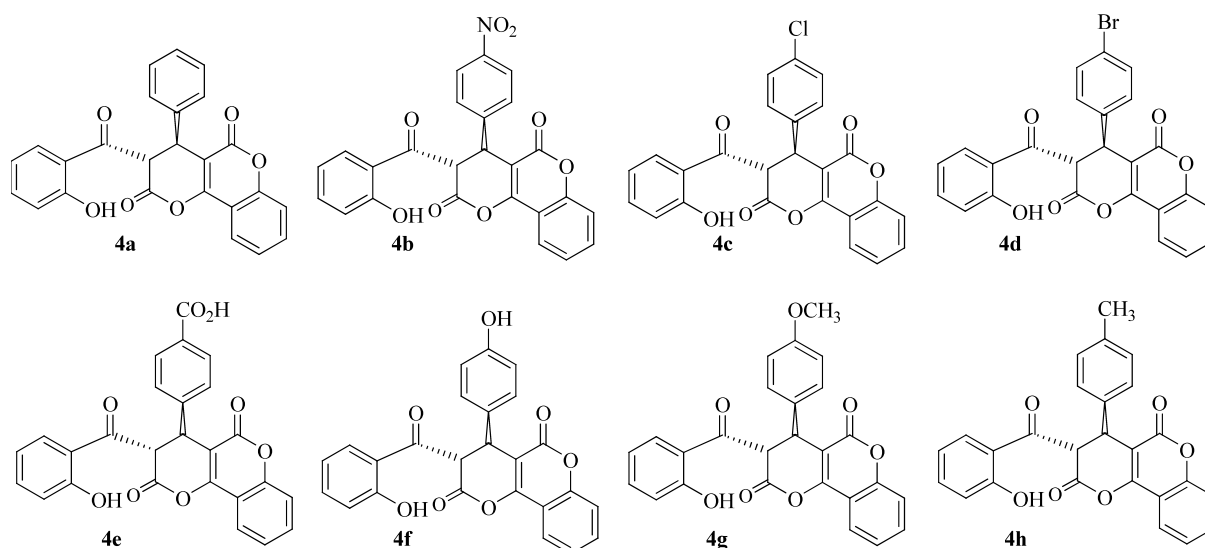

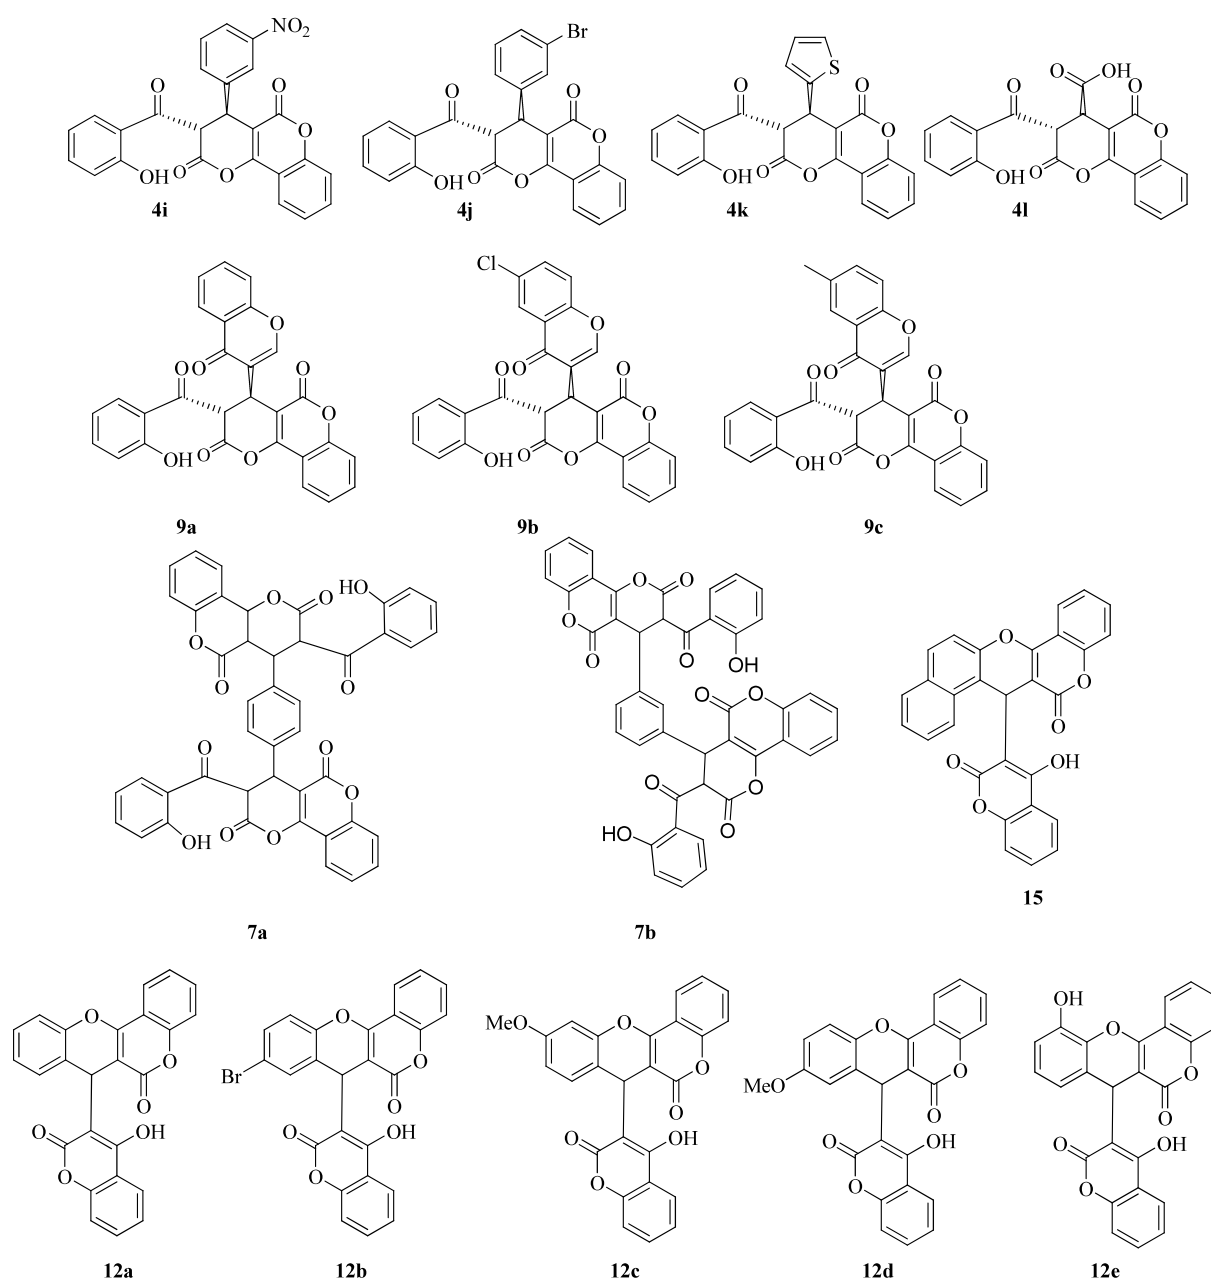

**FIGURE 1:** Structure of all products

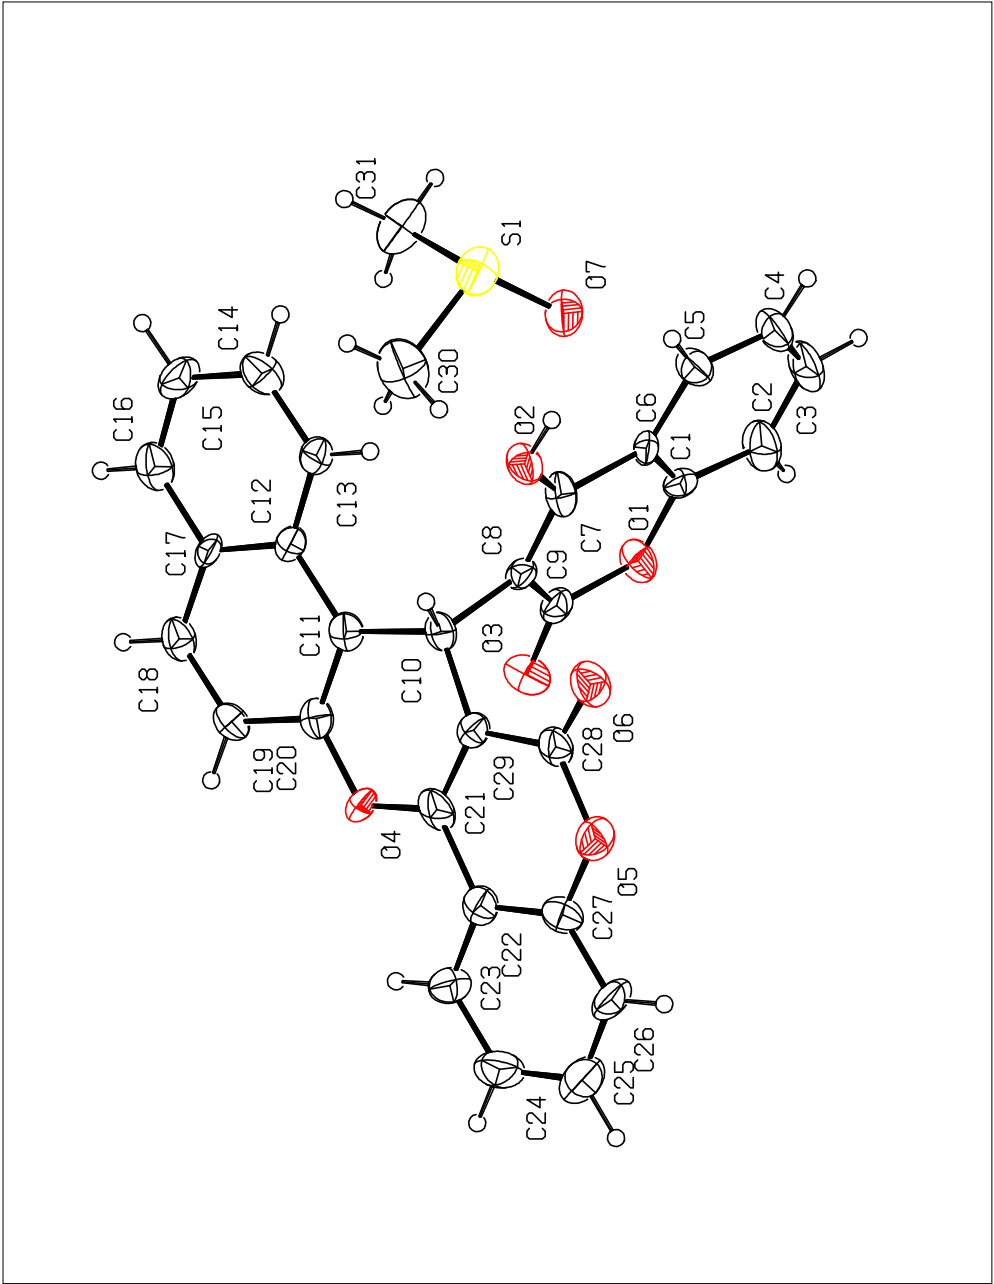

**FIGURE 2.** ORTEP diagram of product **15**

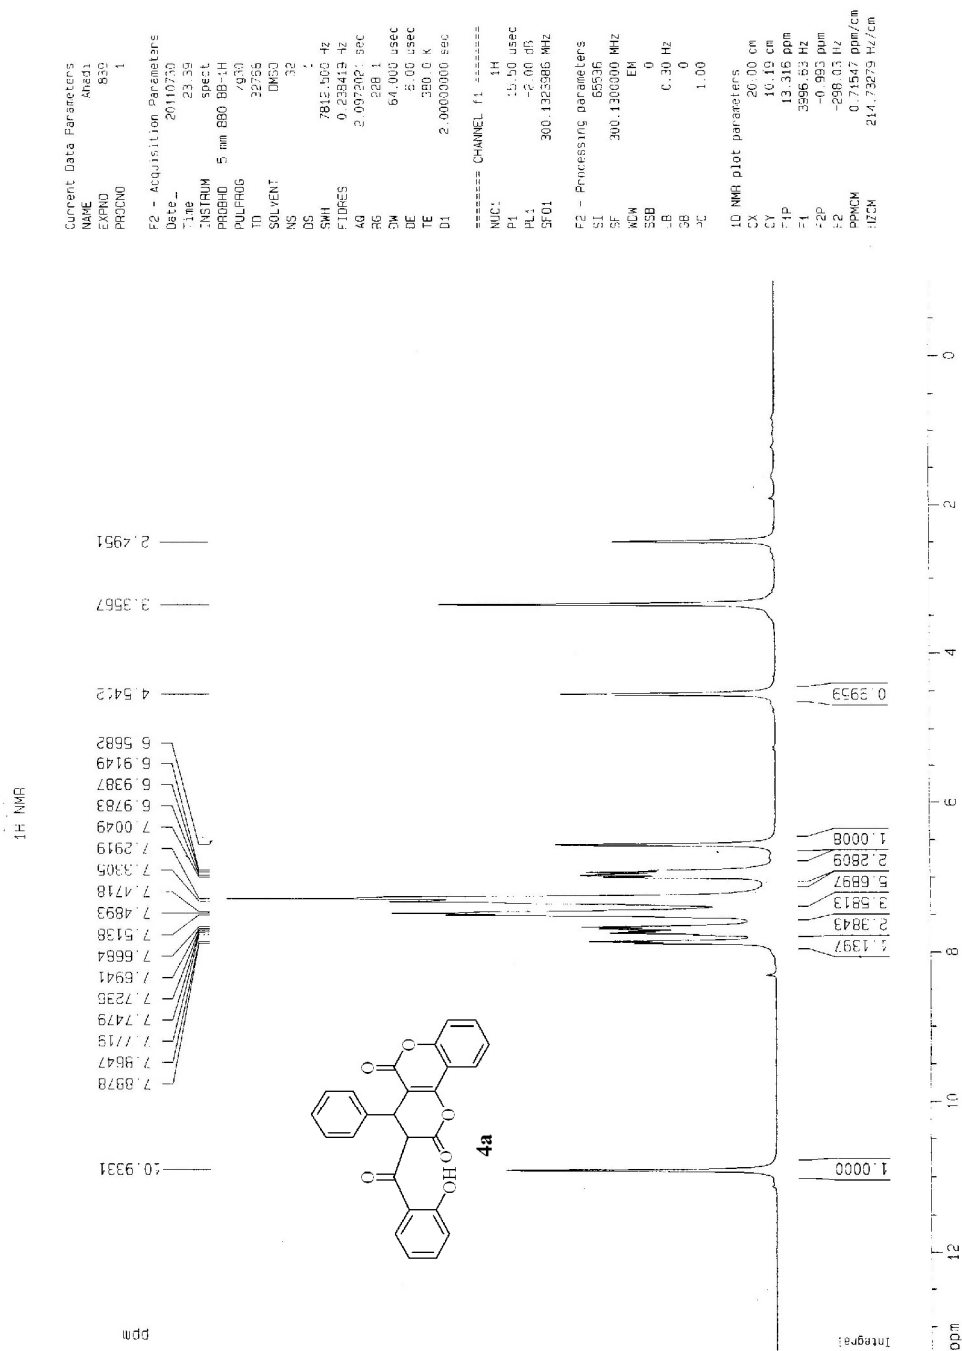

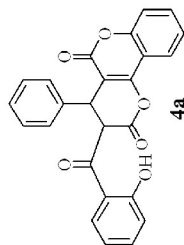

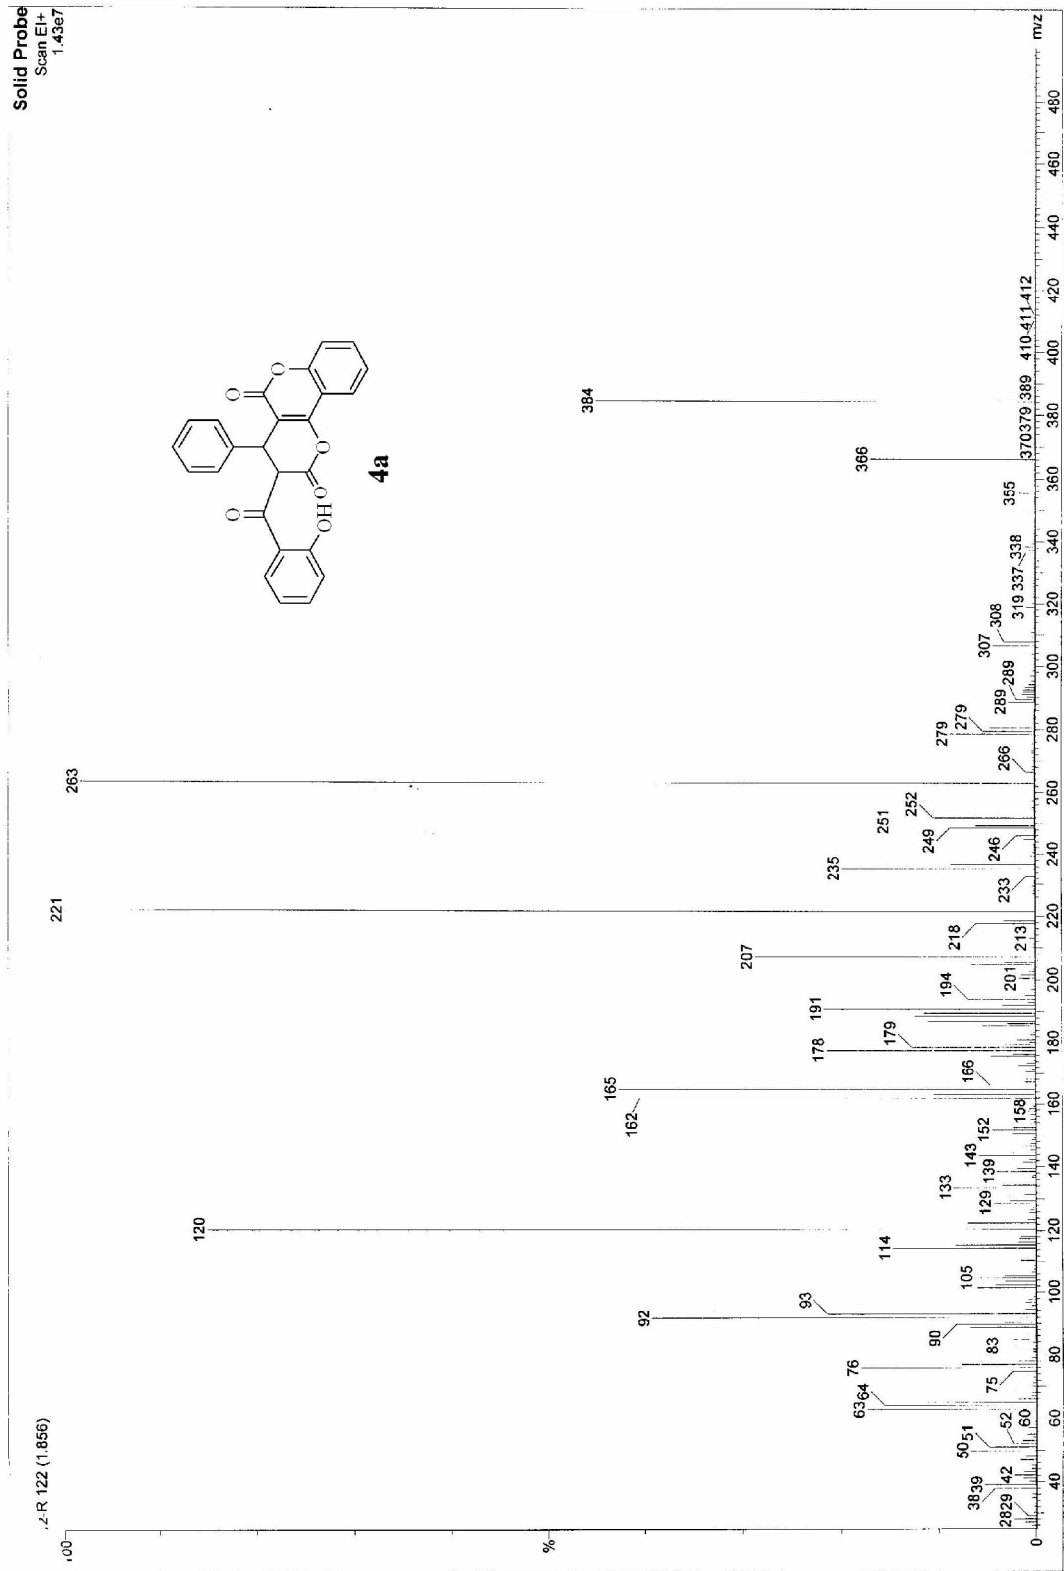

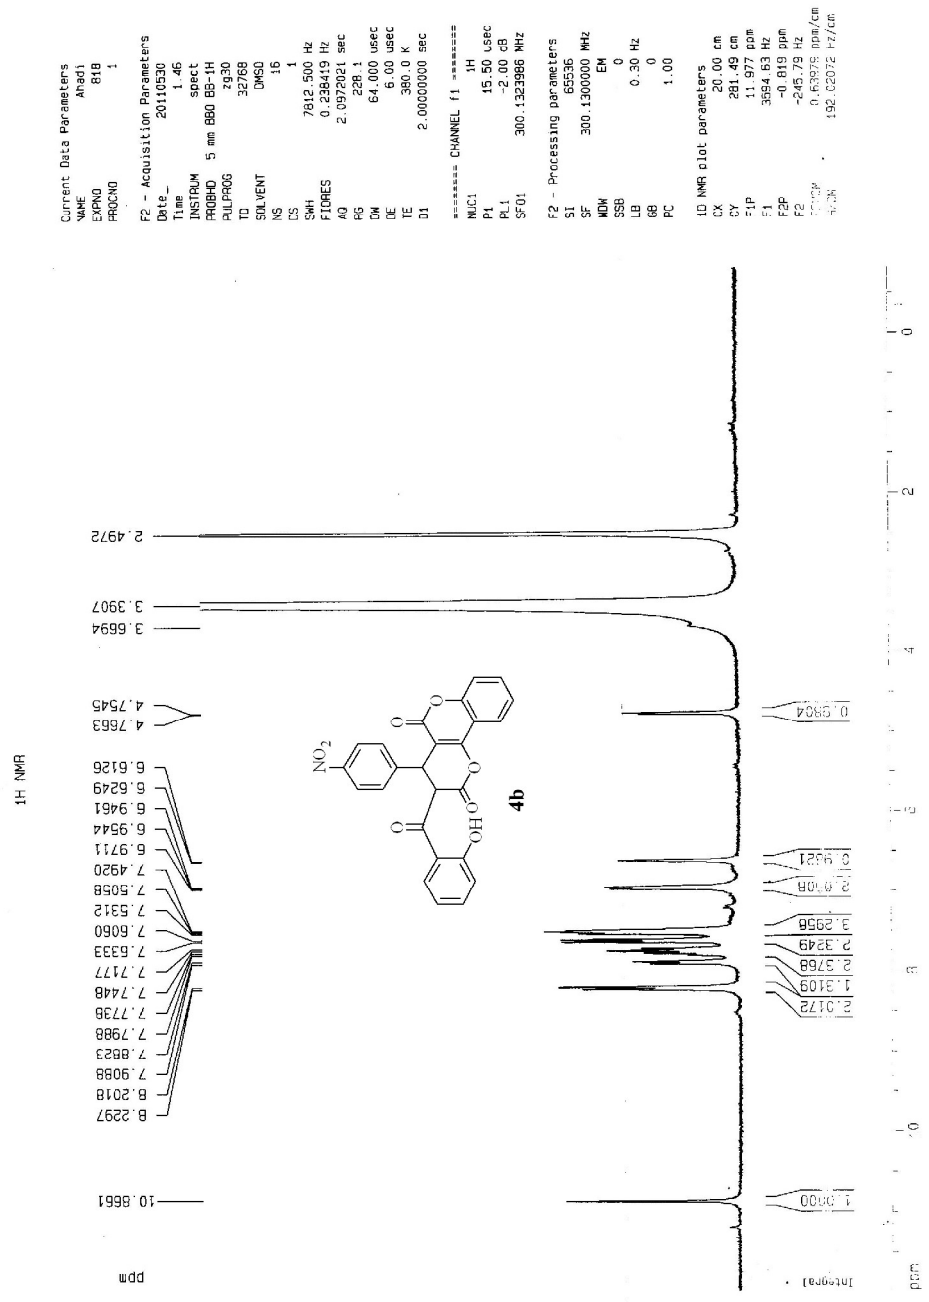

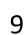

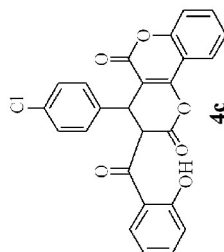

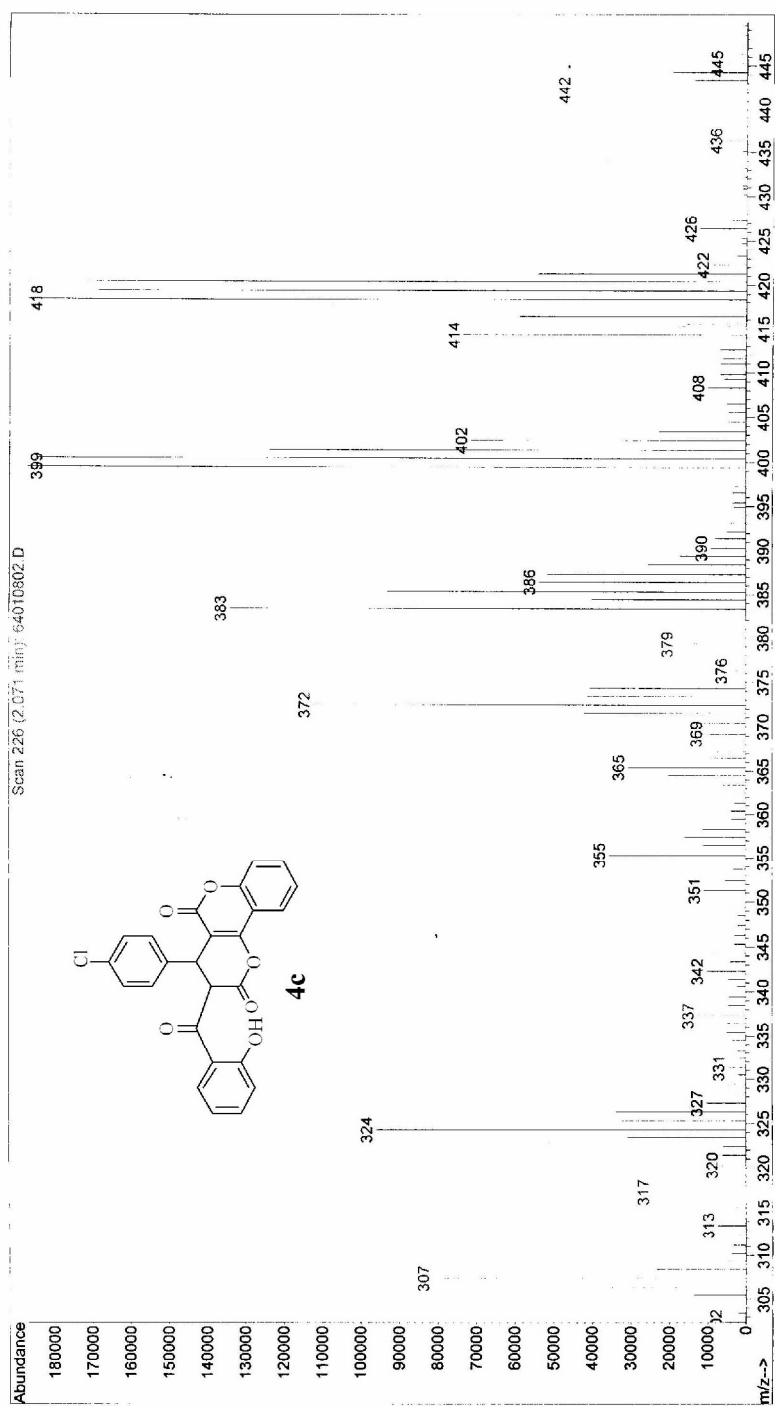

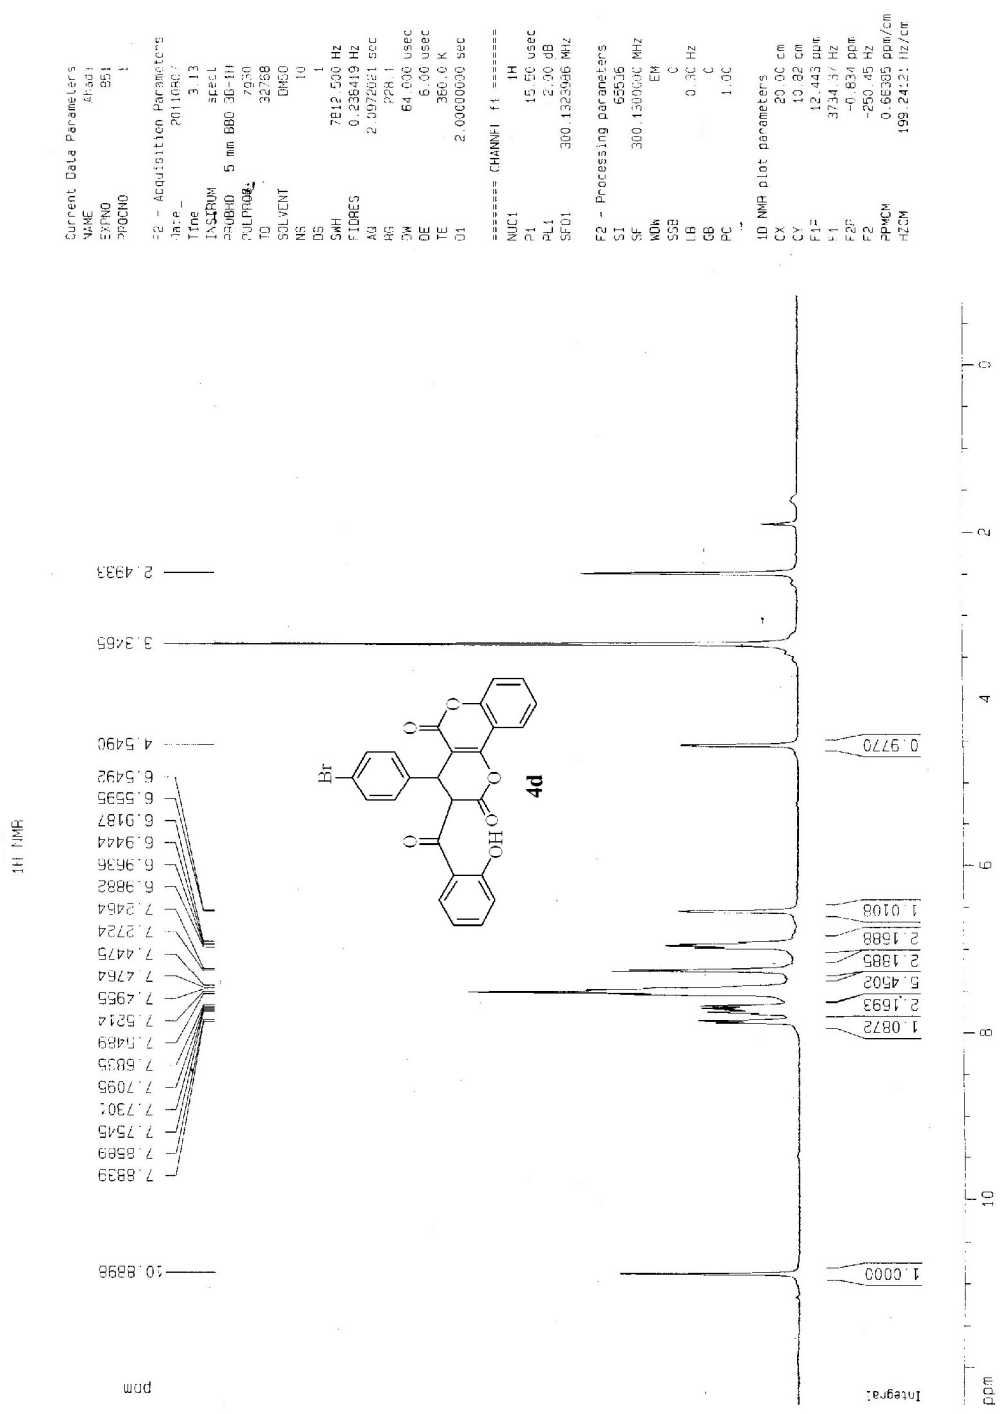

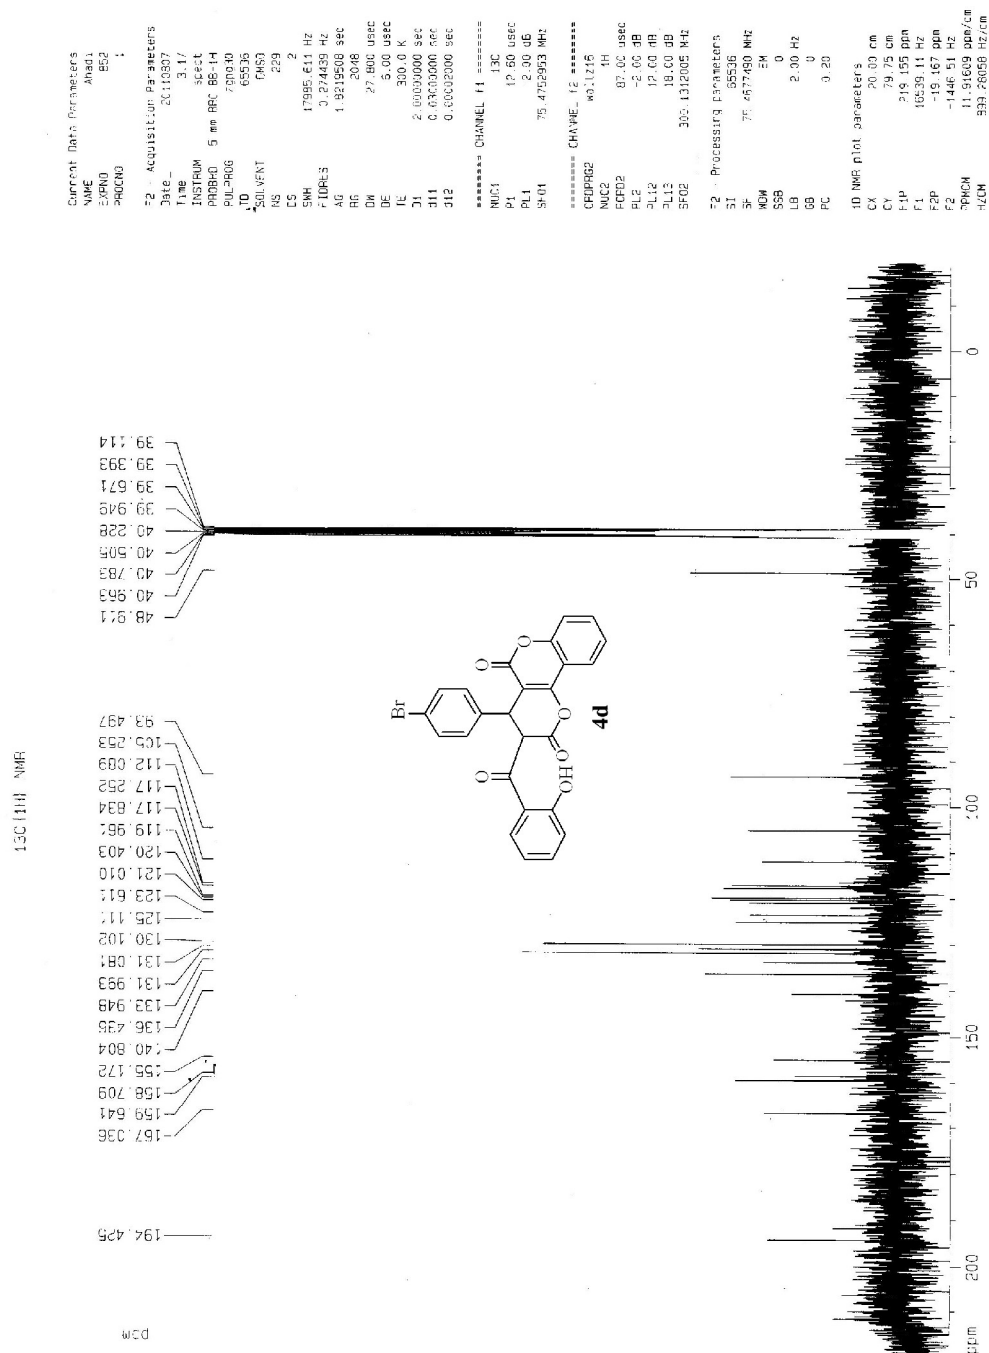

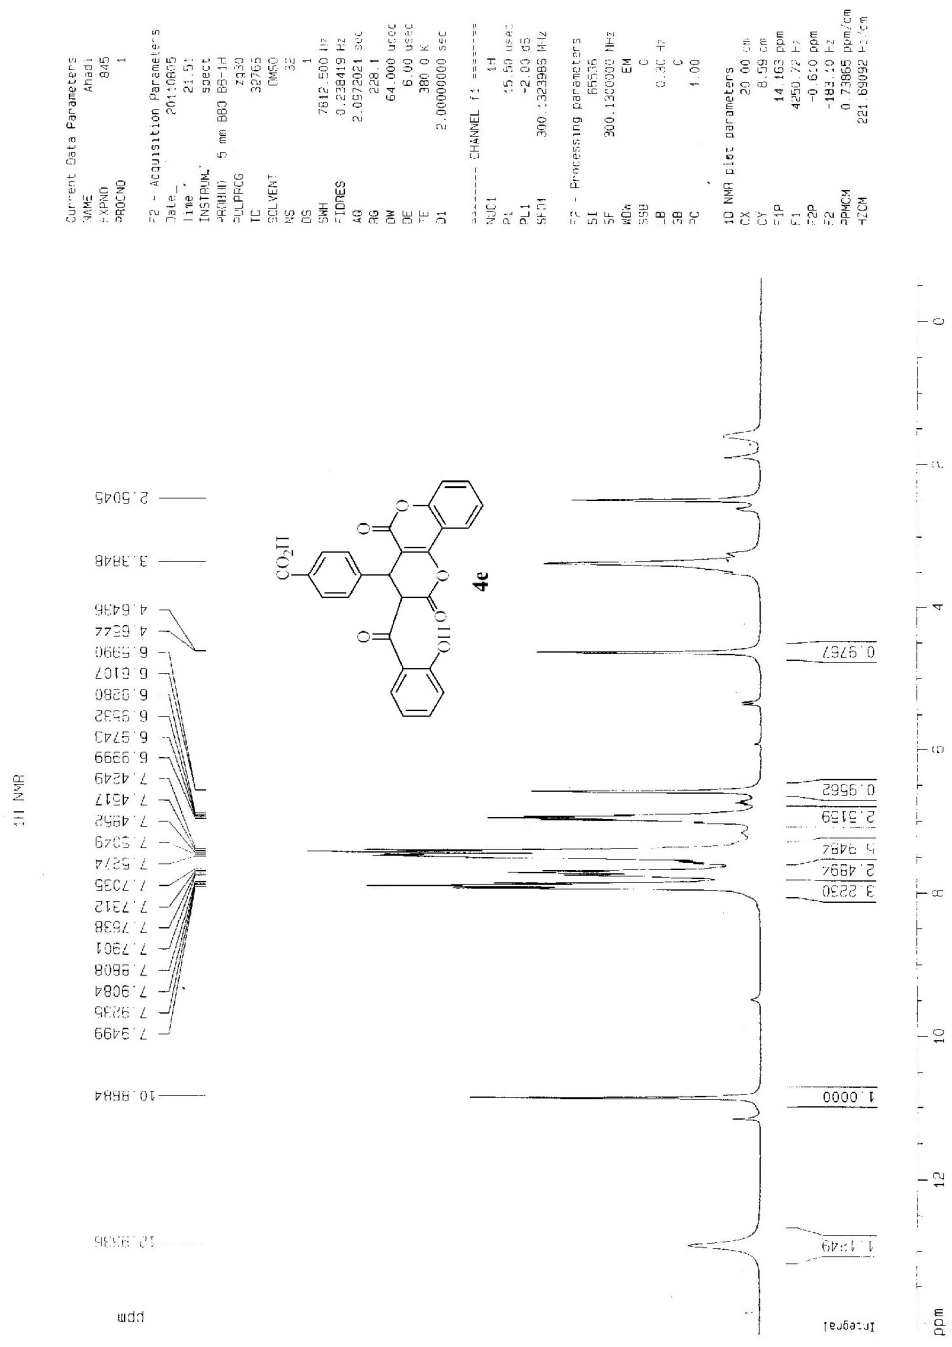

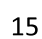

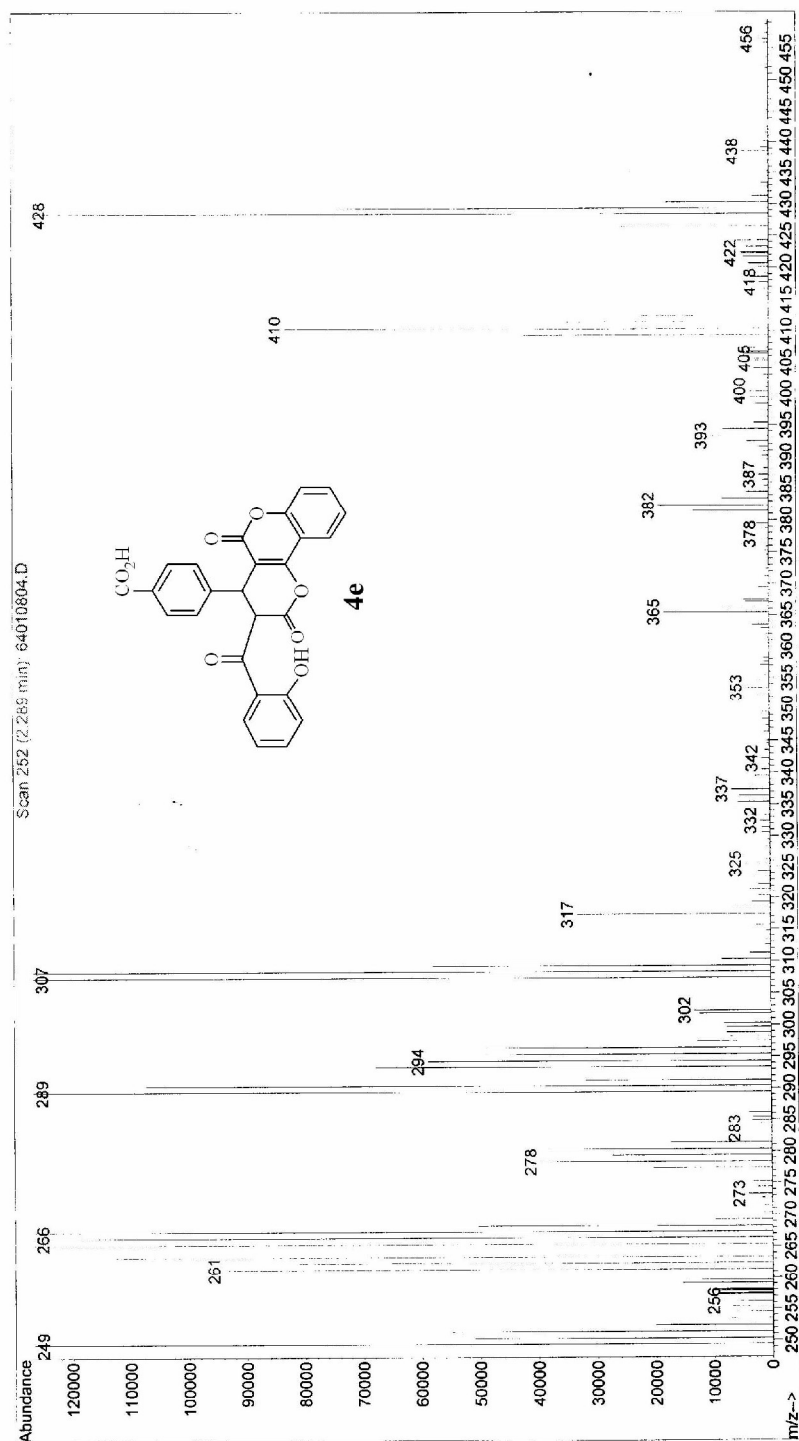

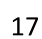

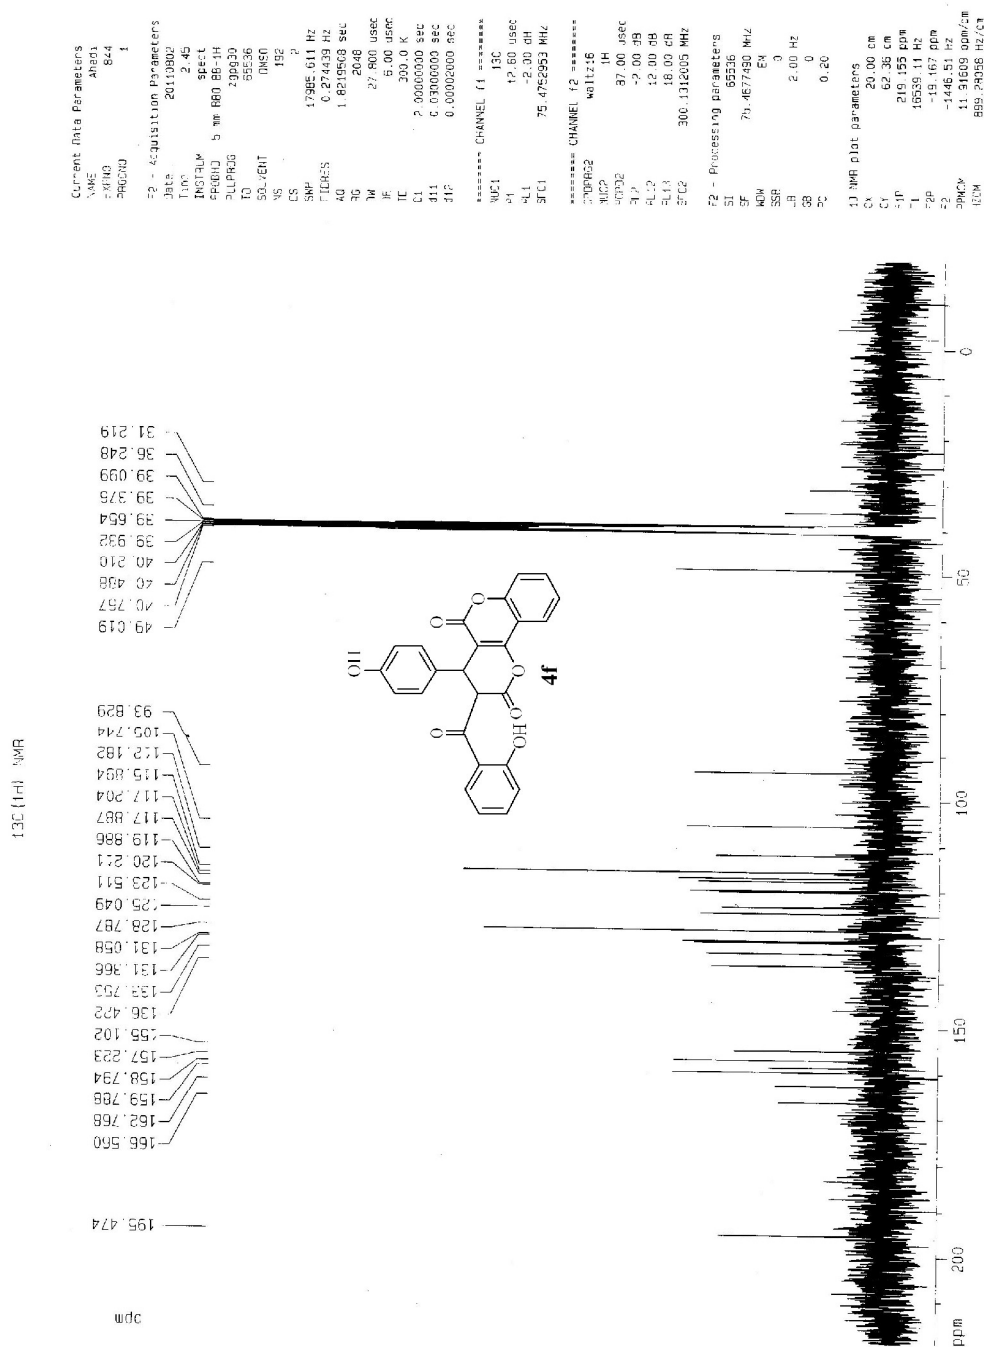

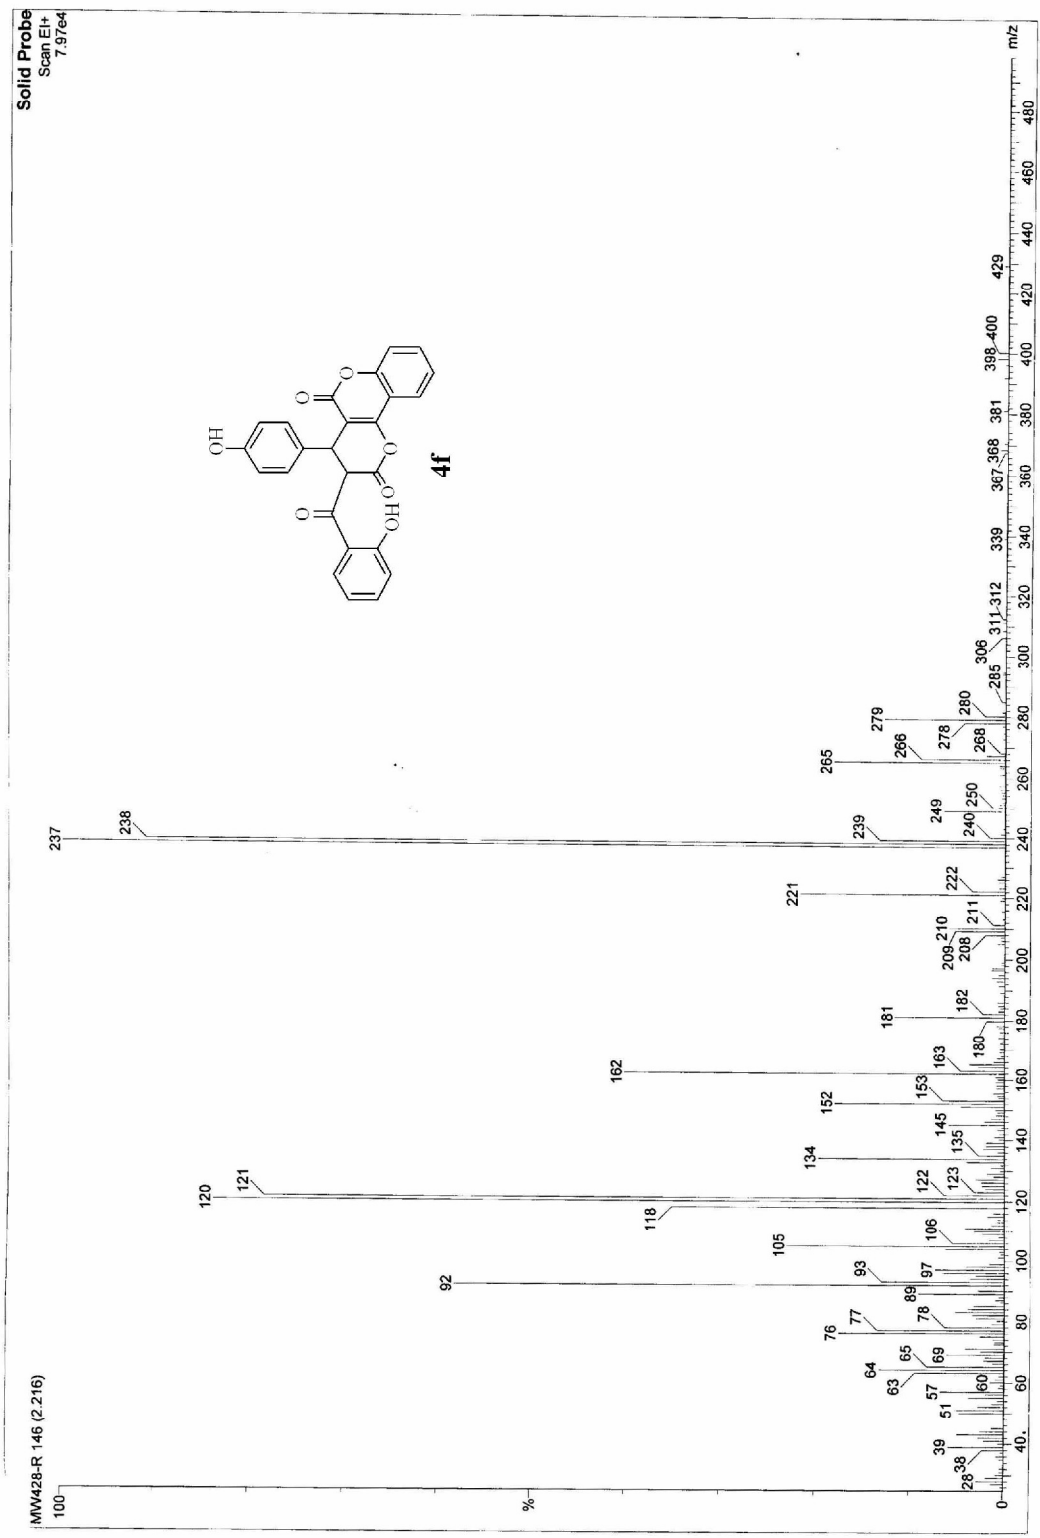

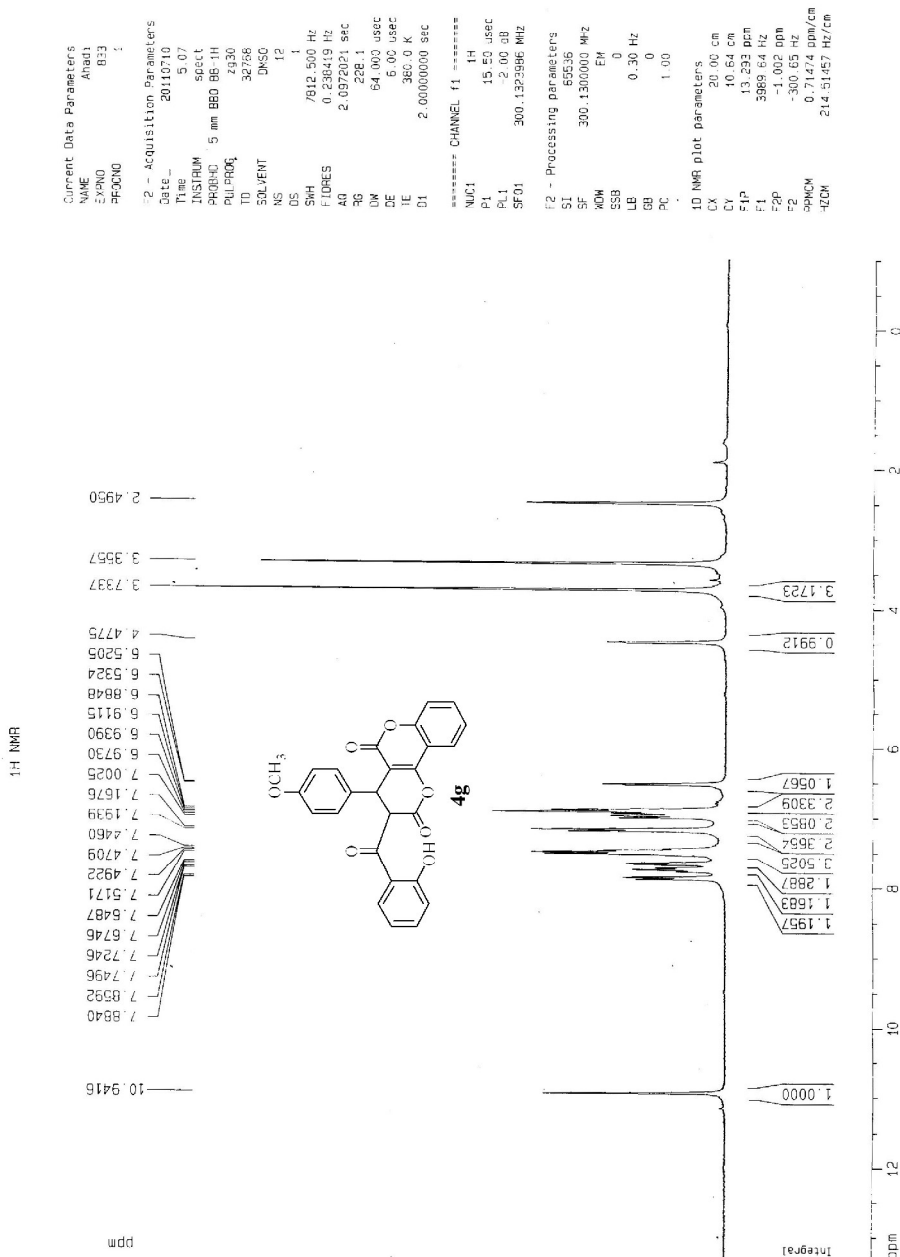

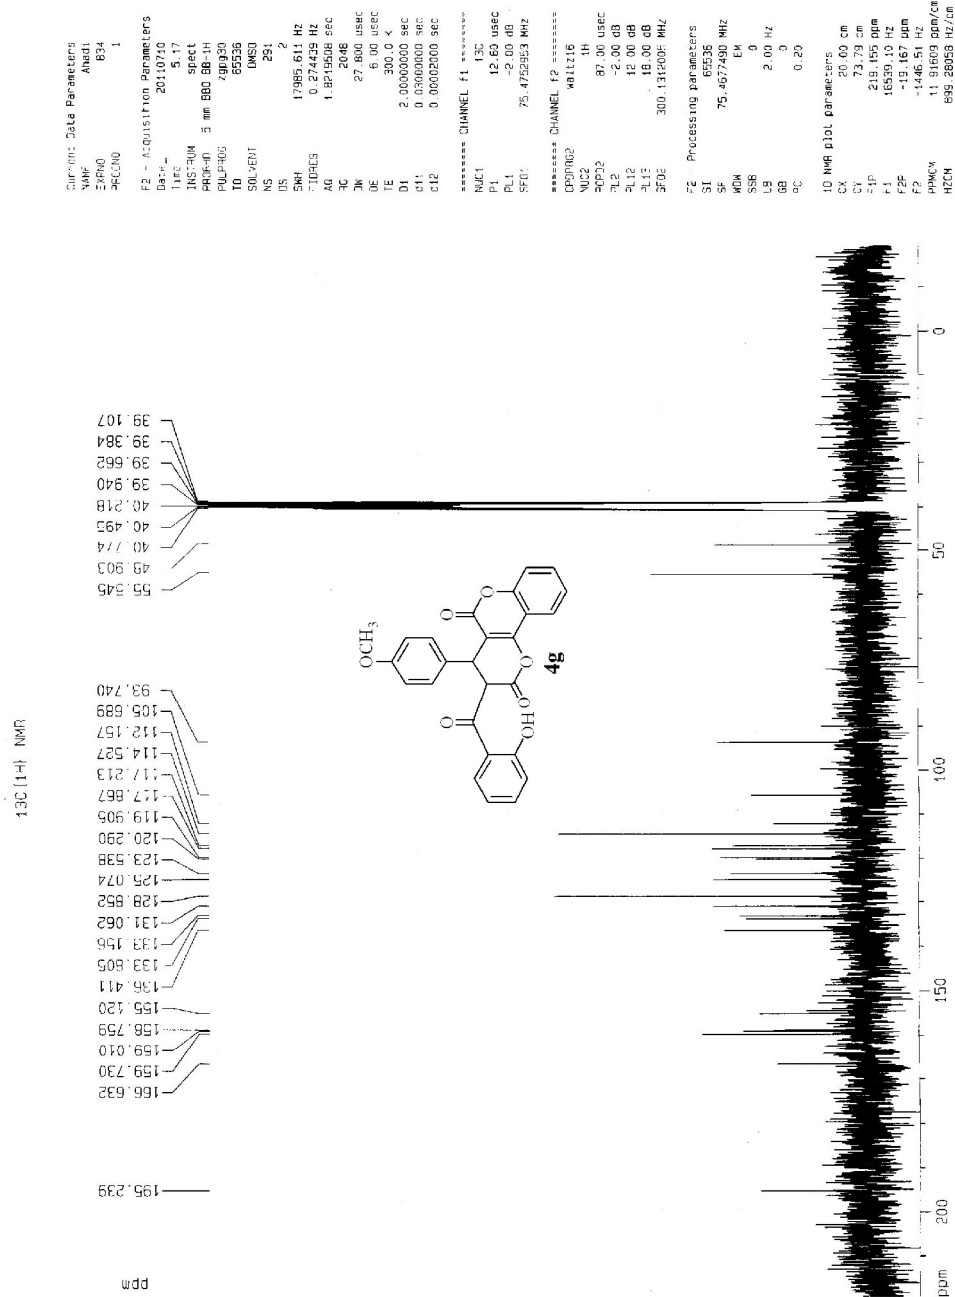

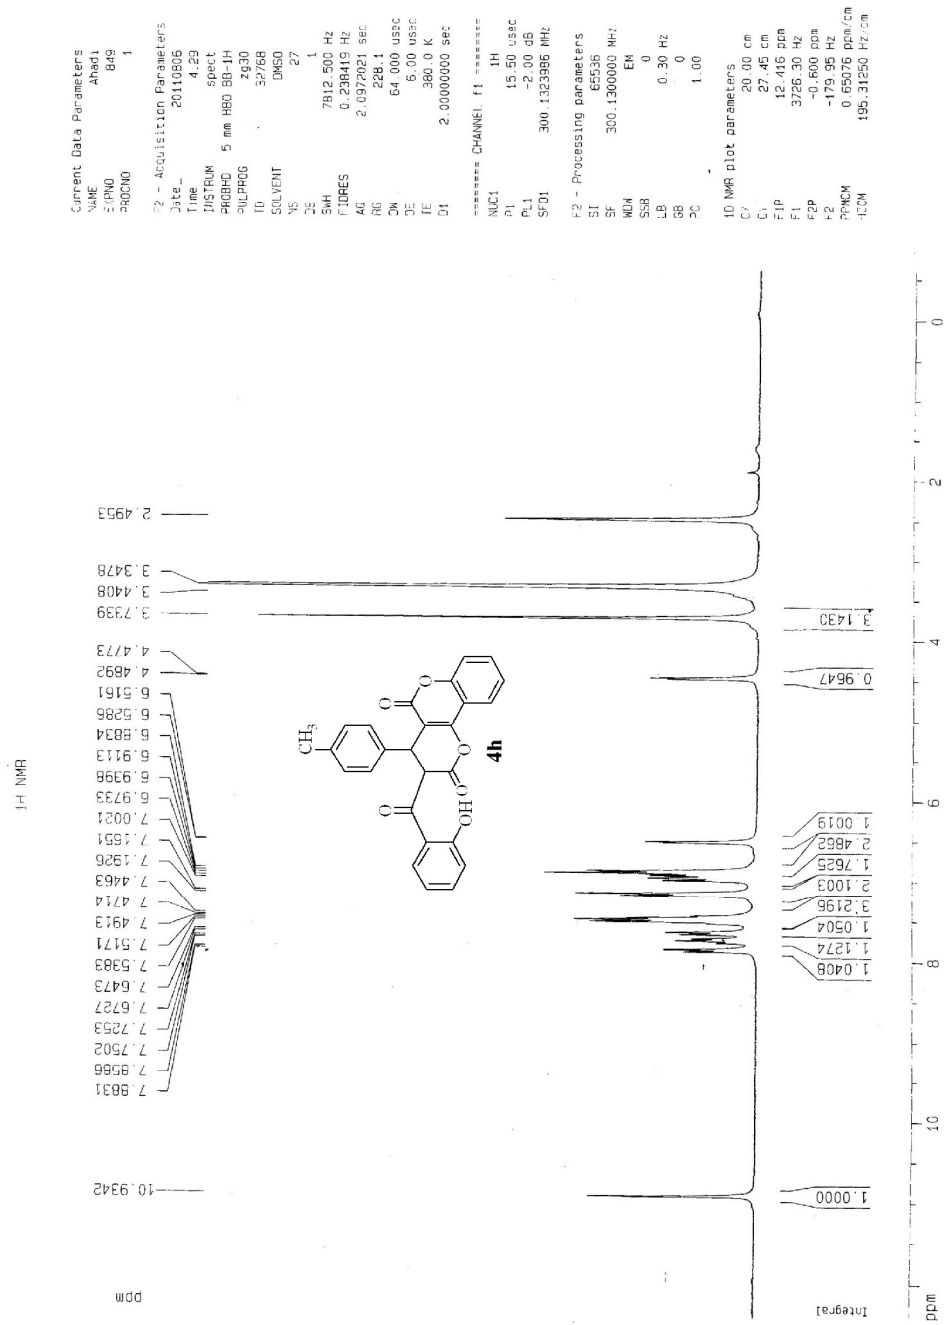

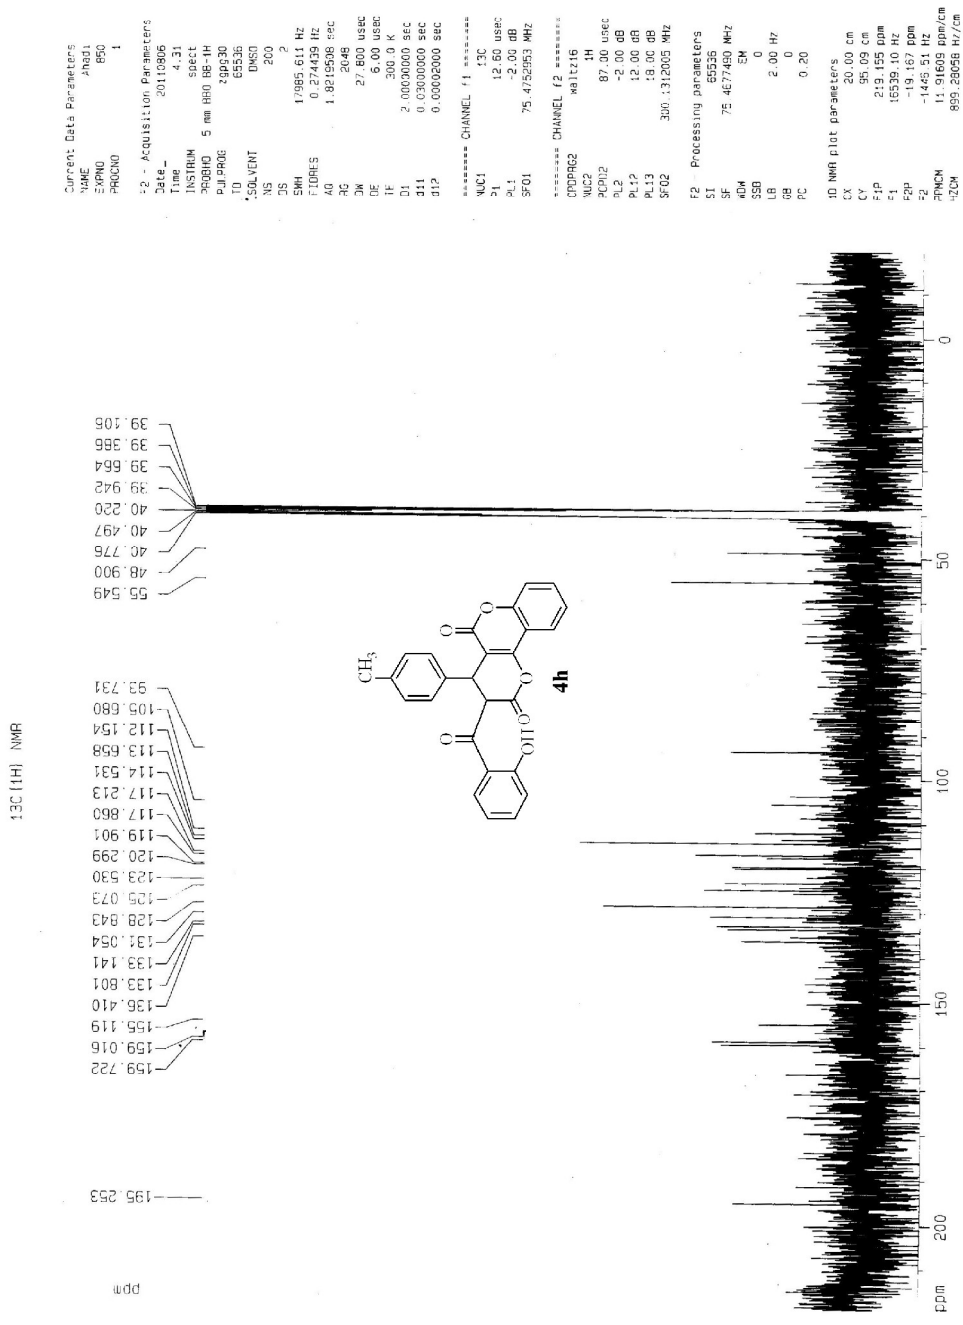

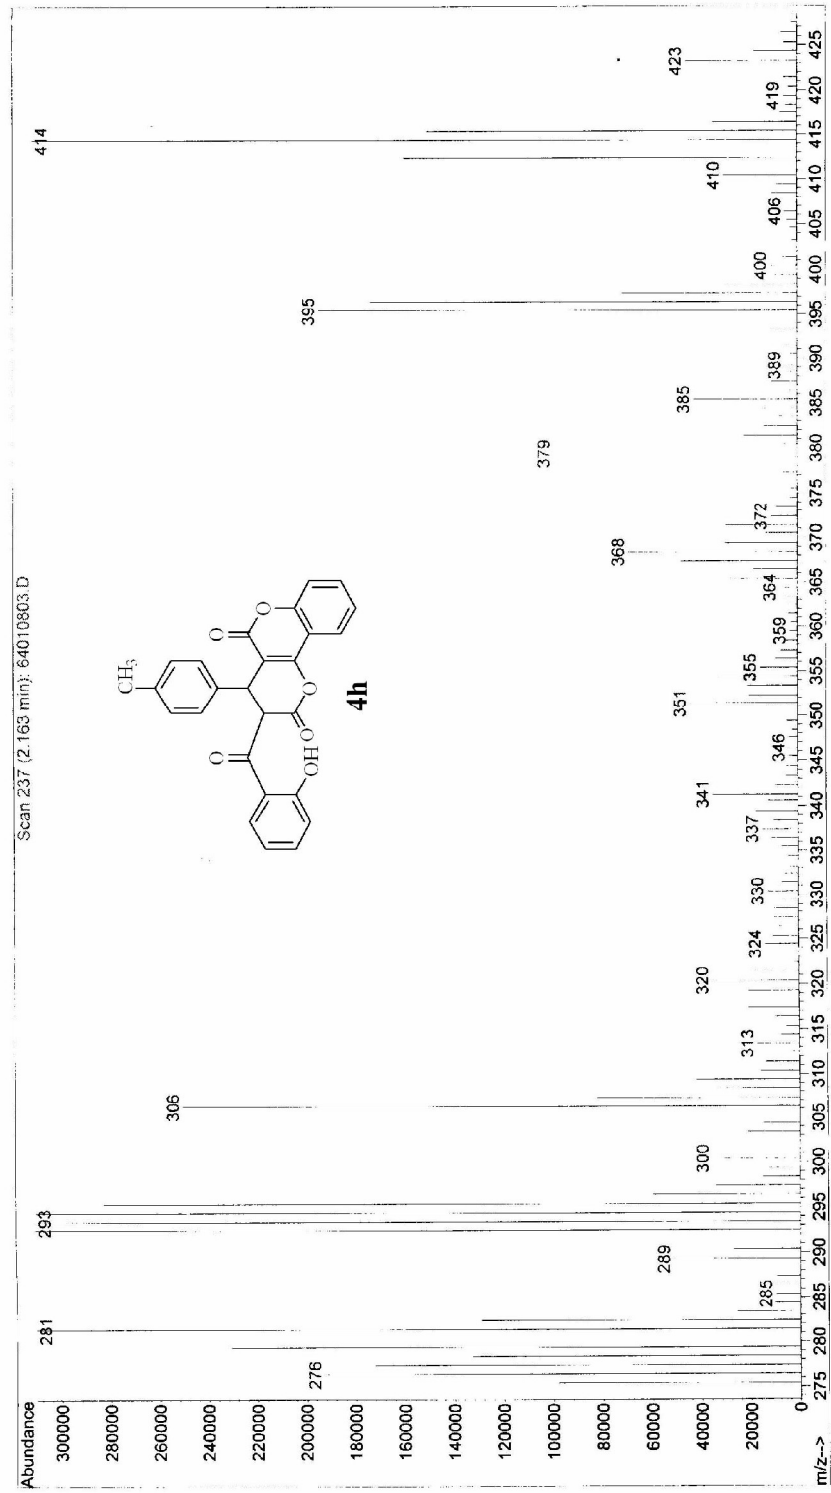

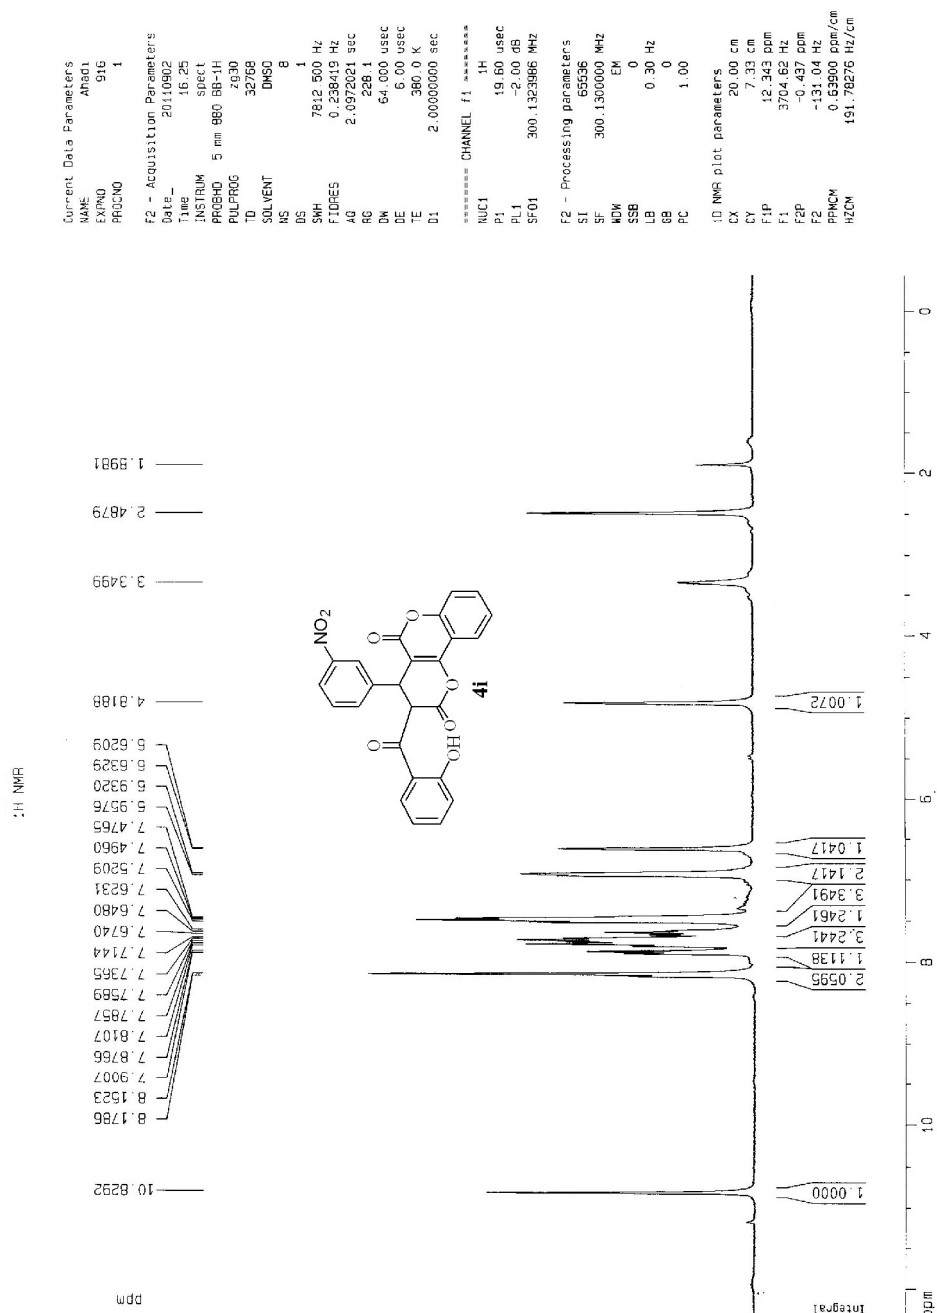

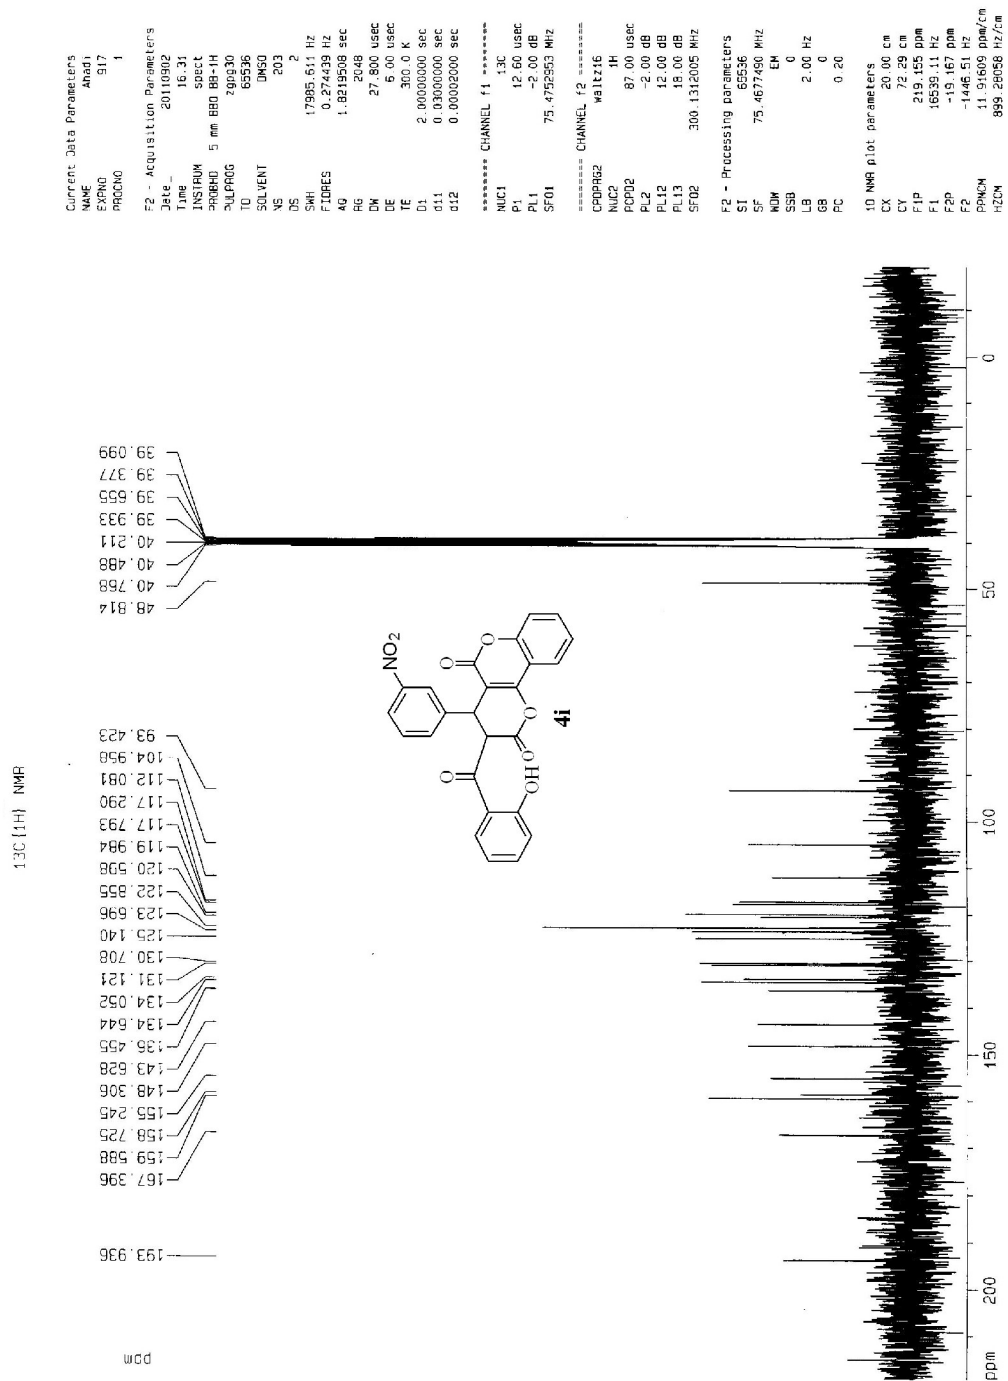

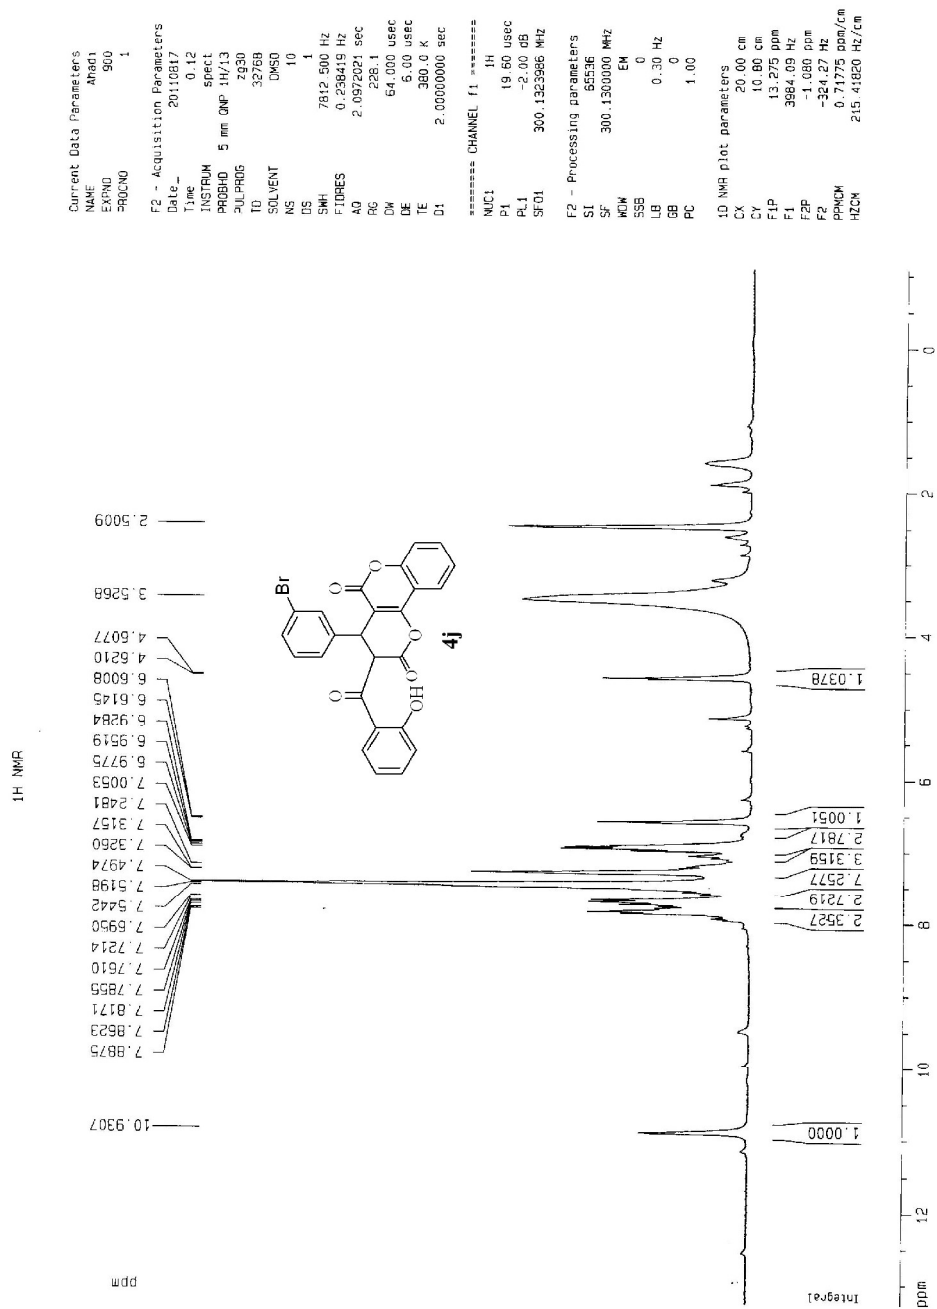

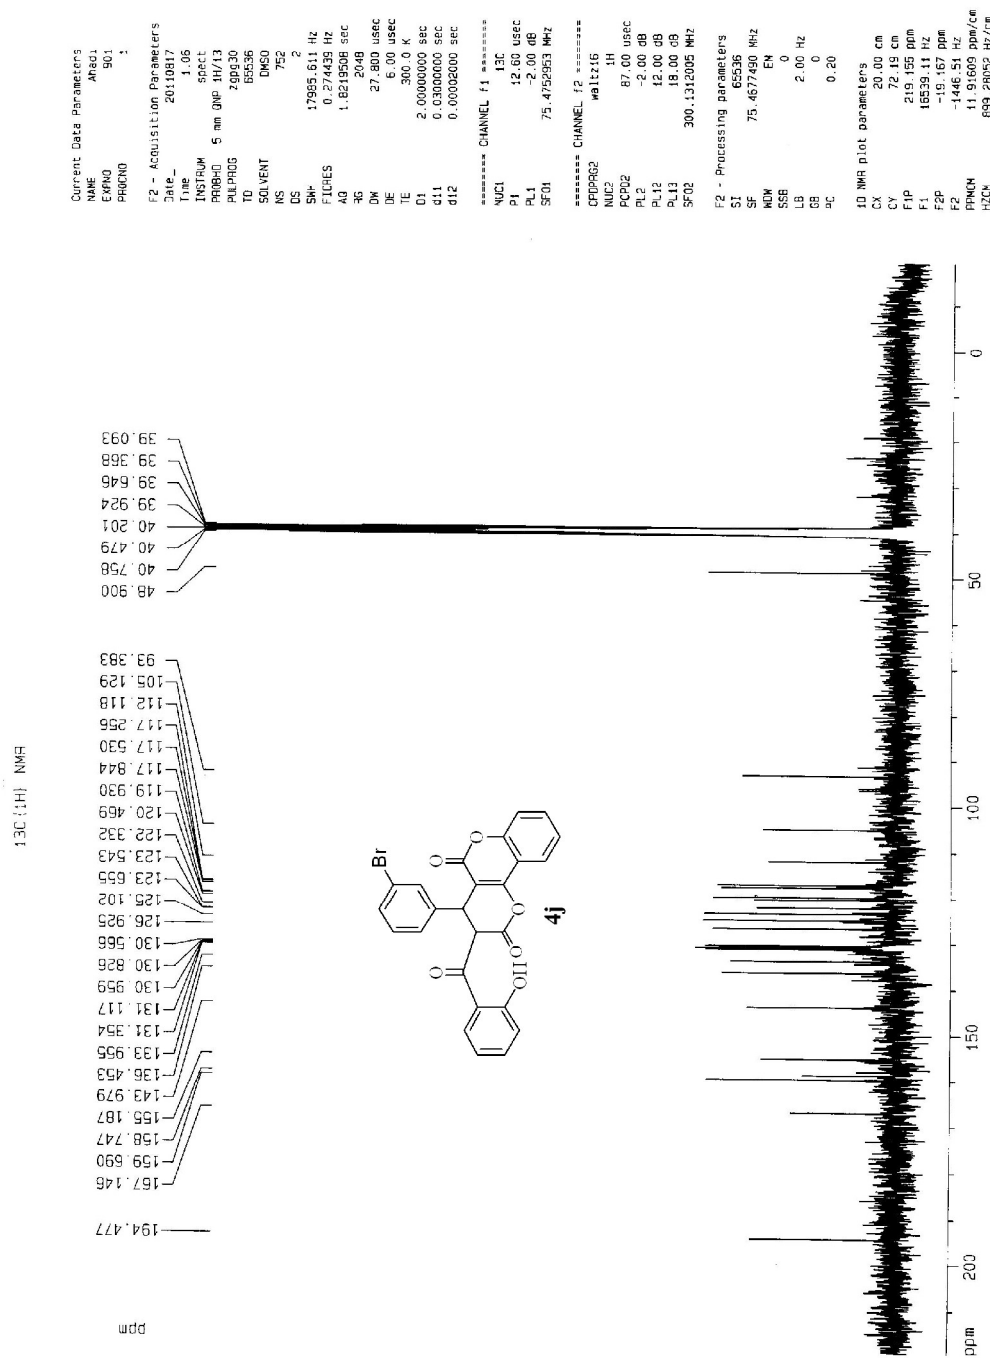

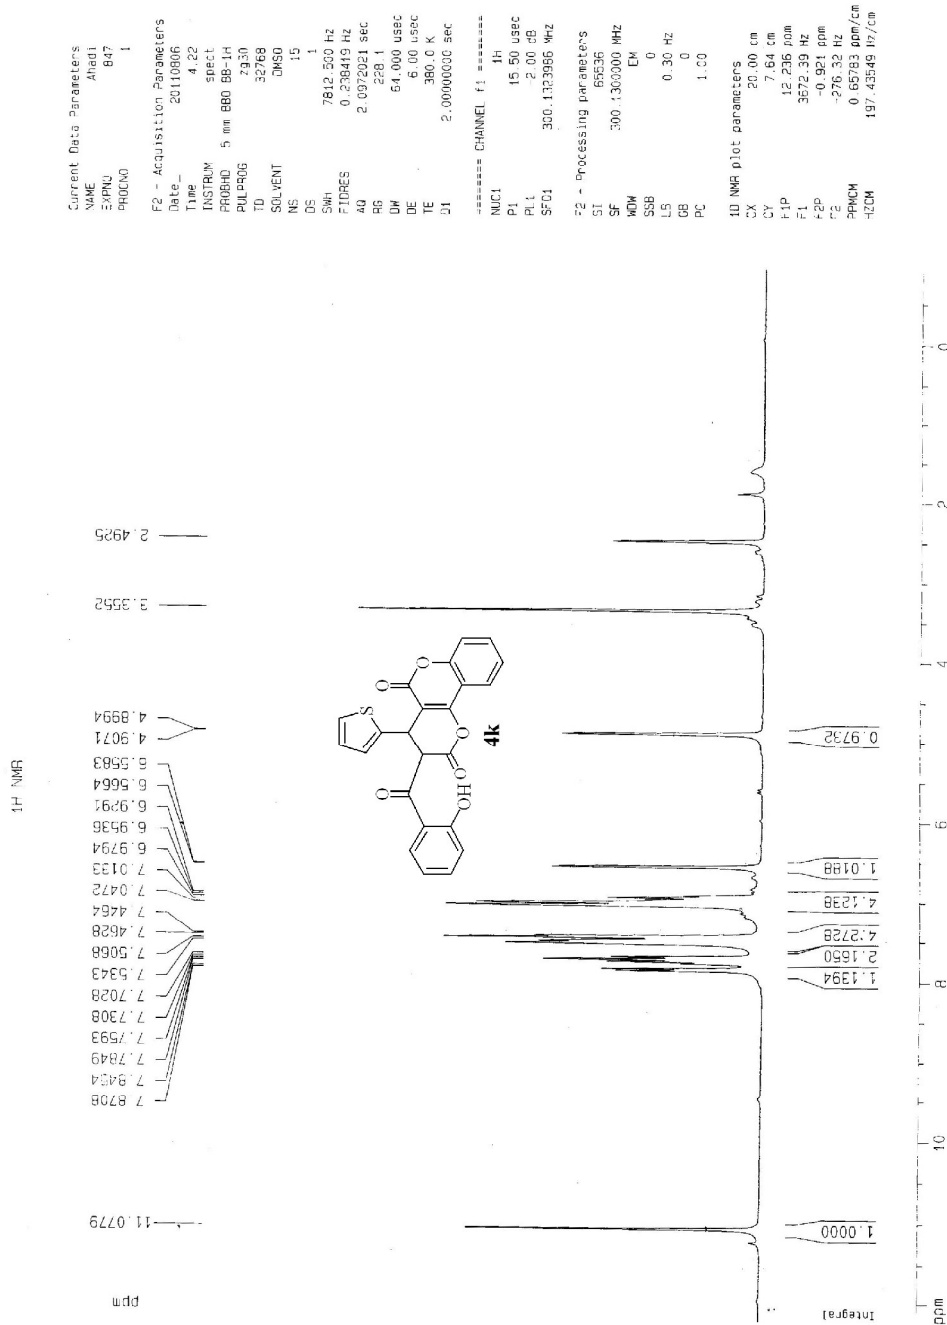

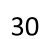

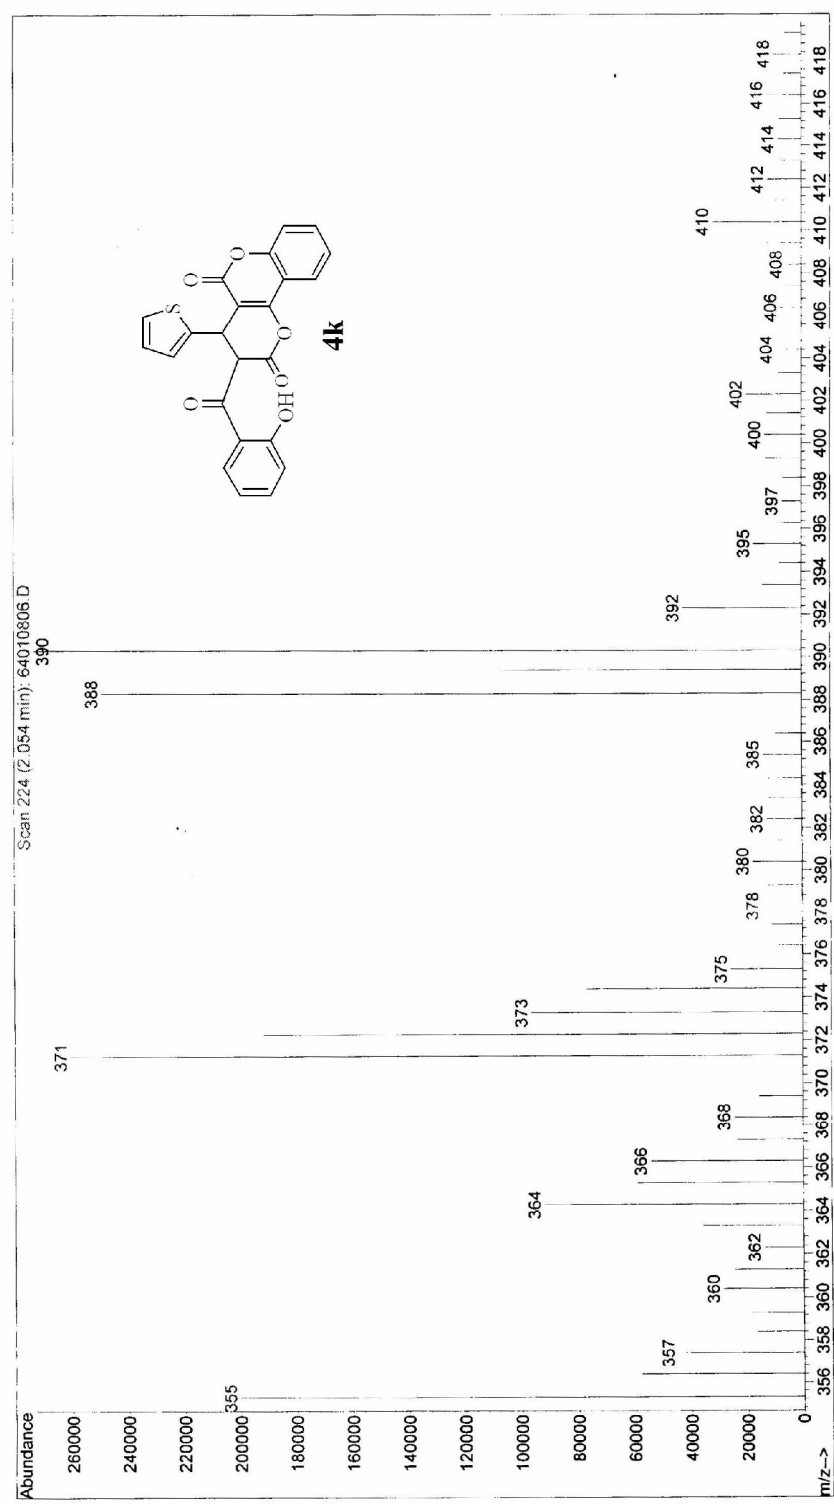

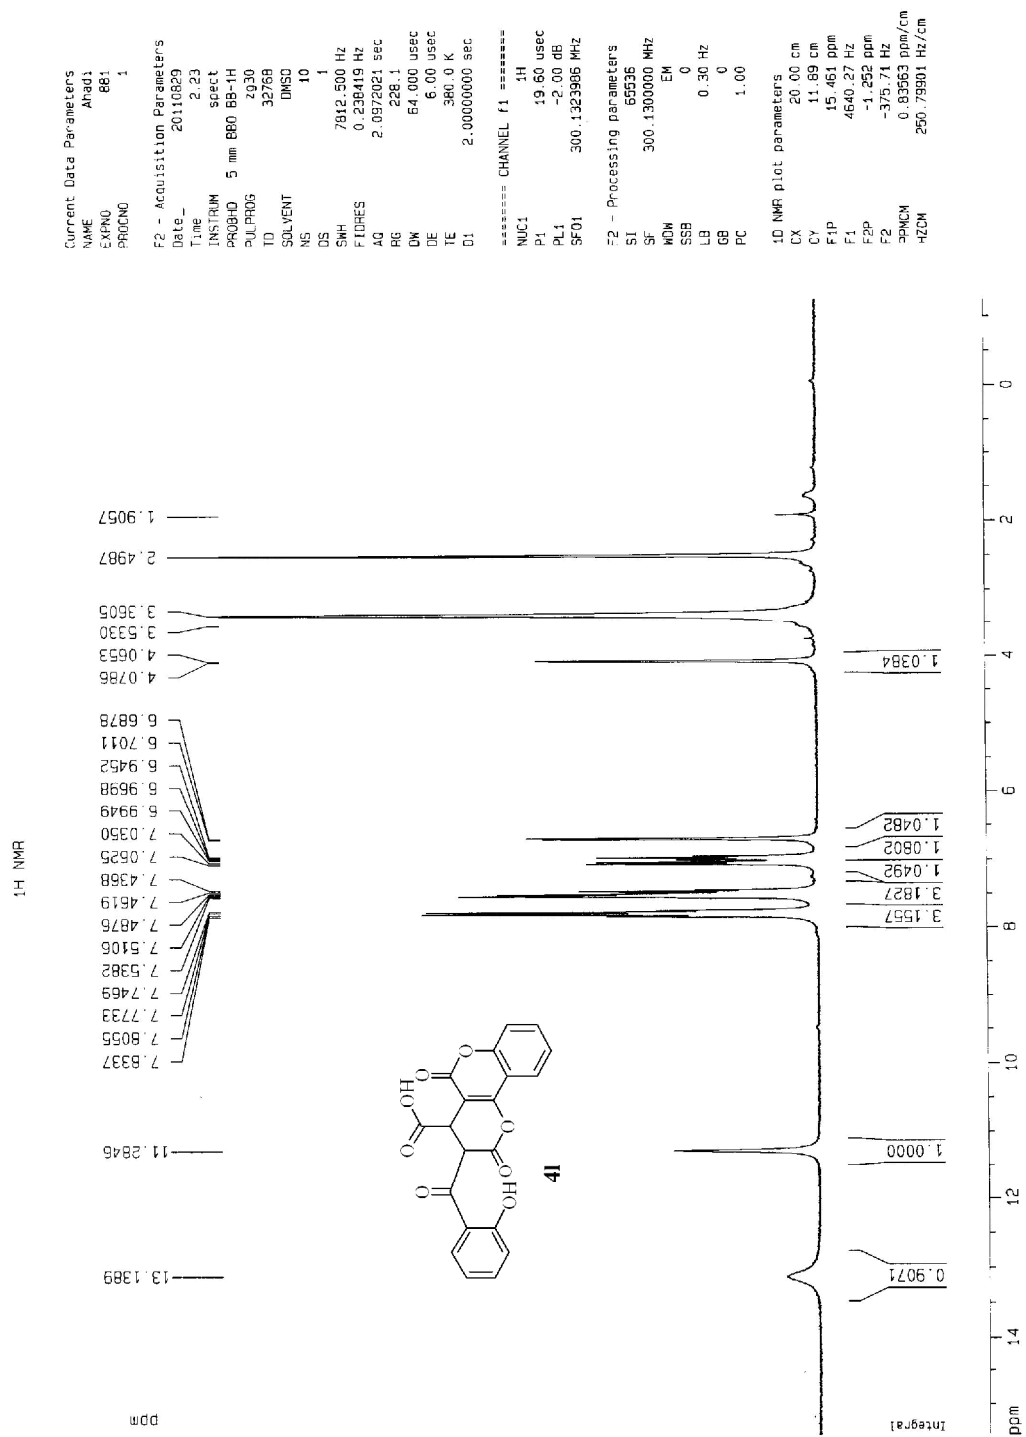

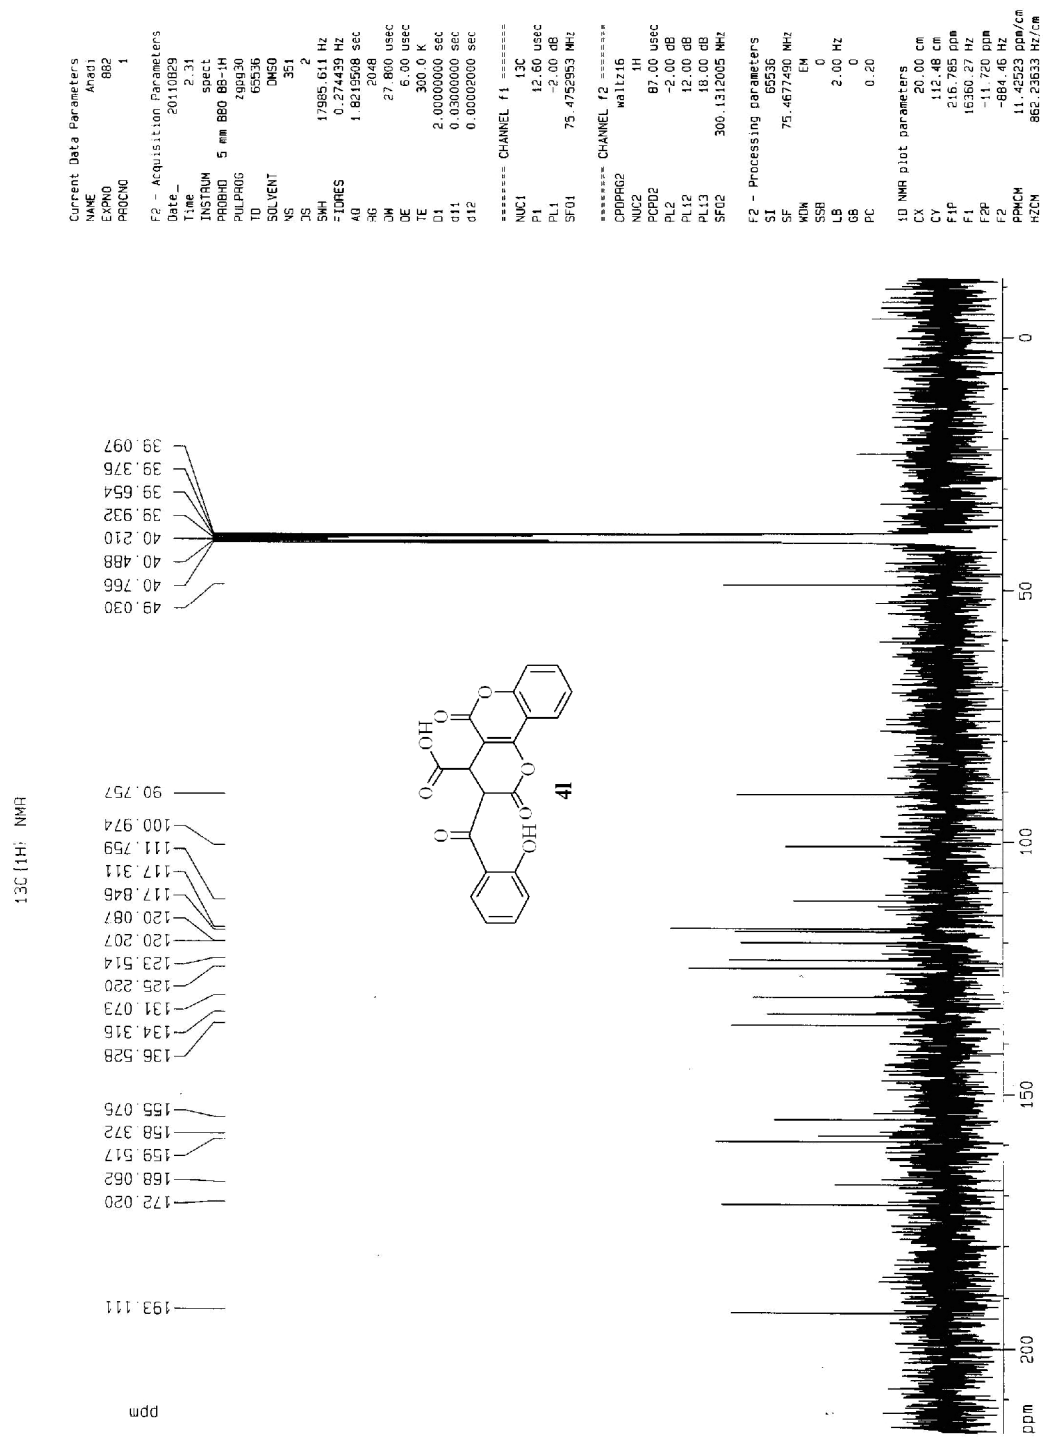

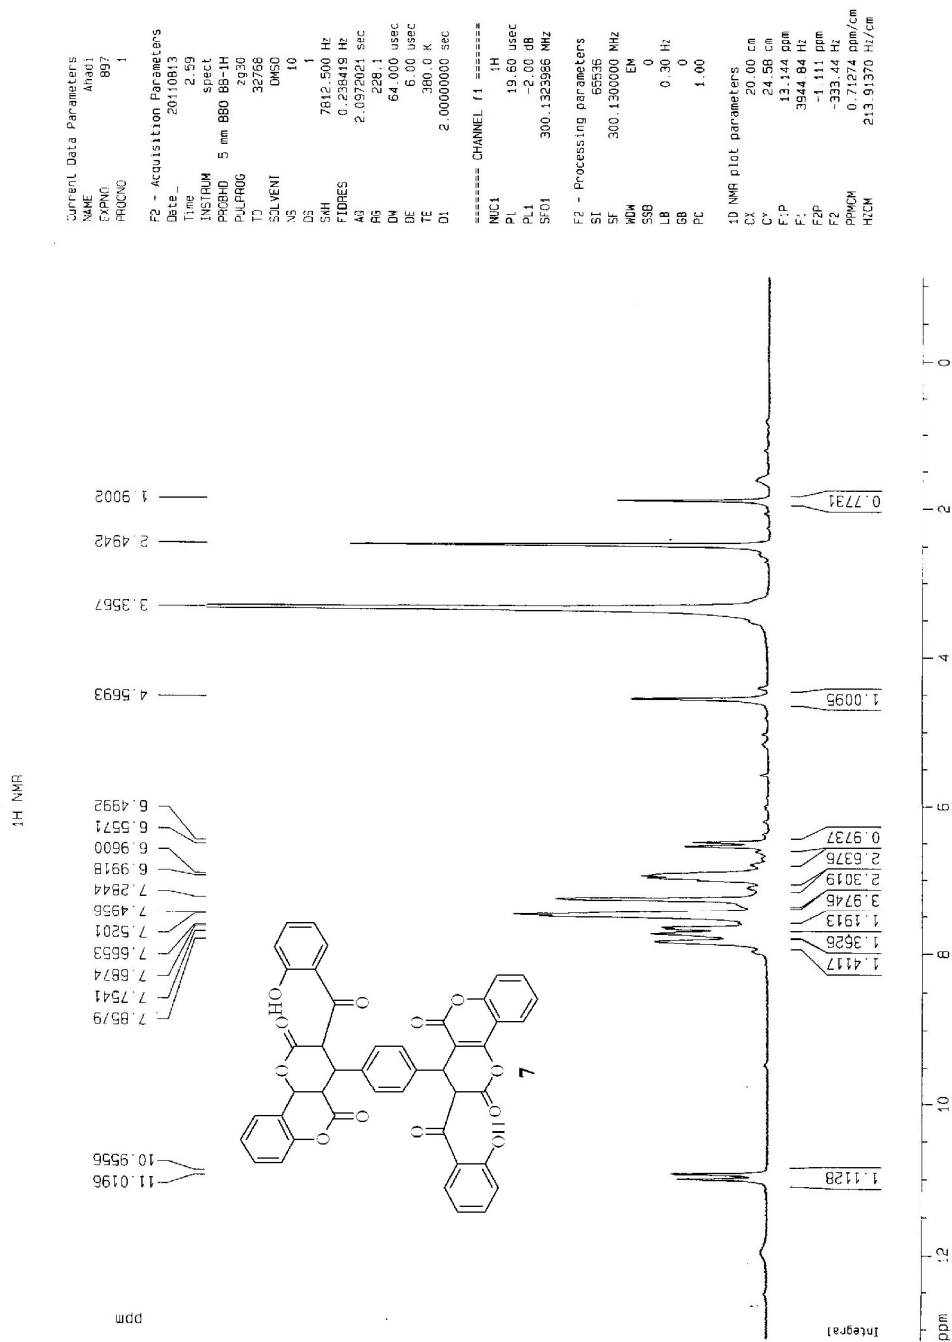

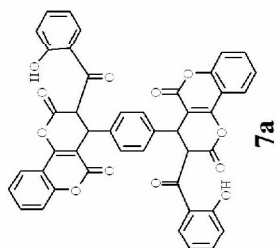

<sup>1</sup>H NMR

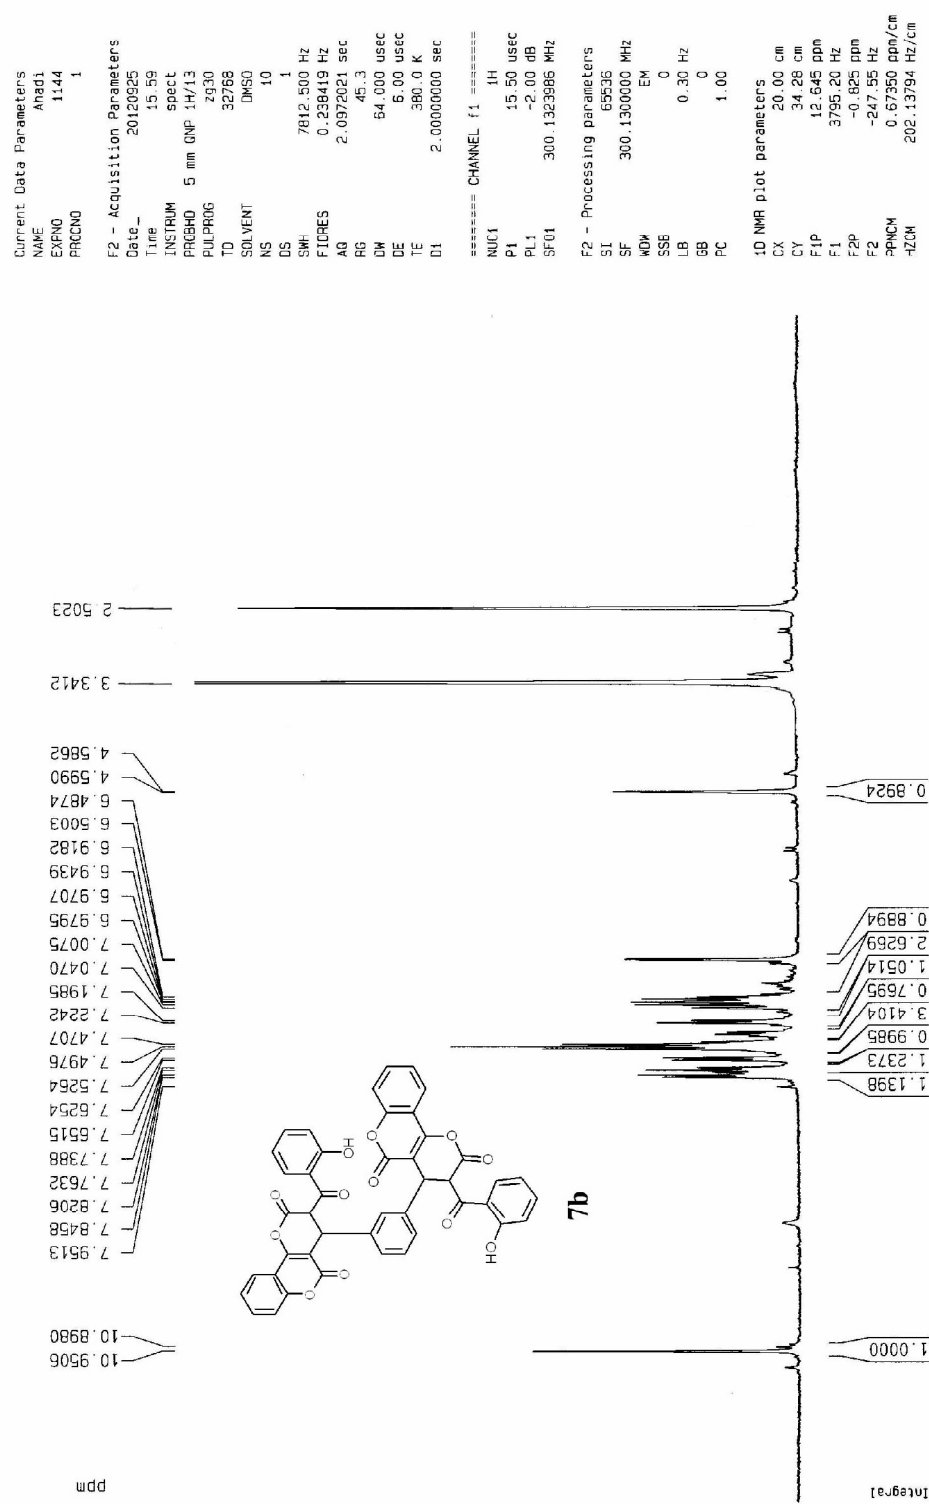

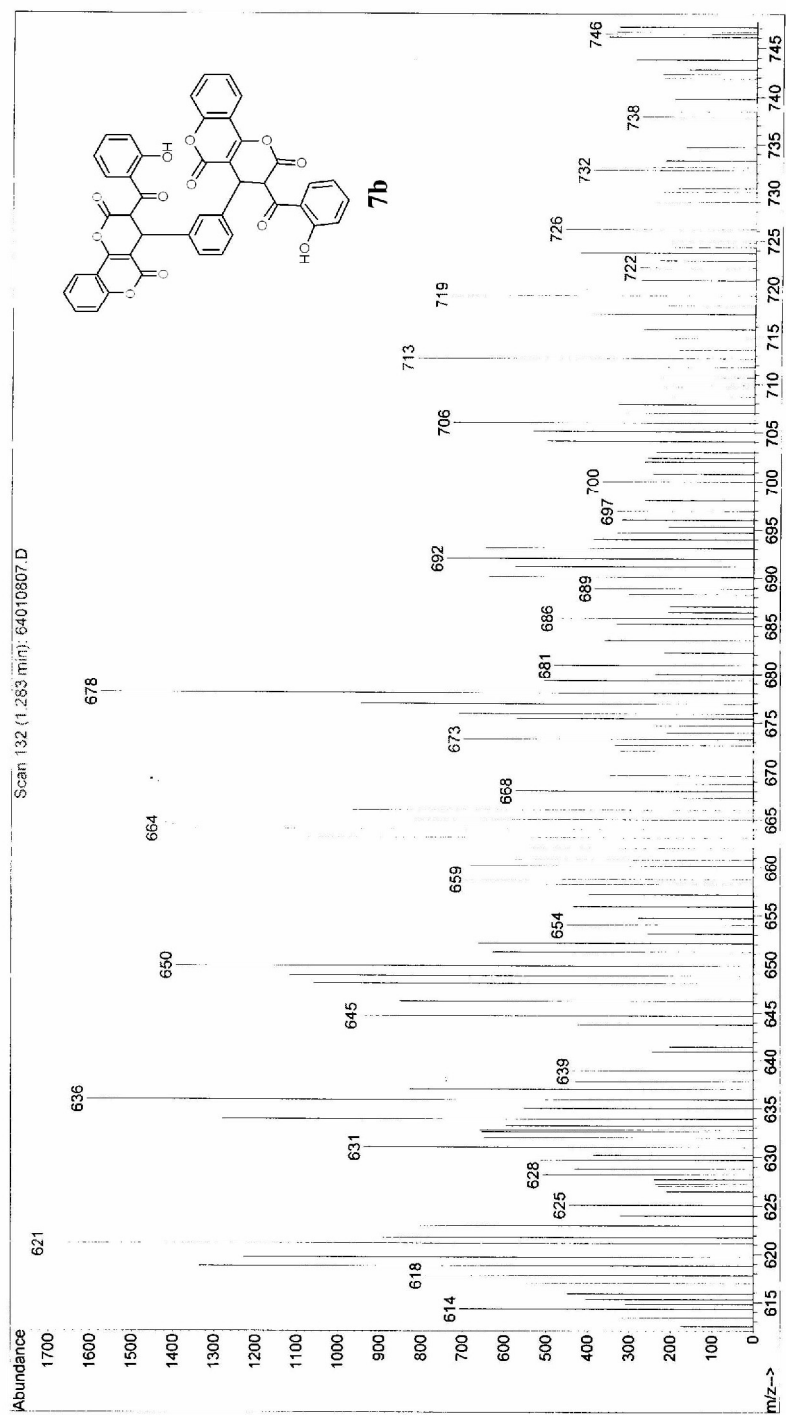

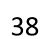

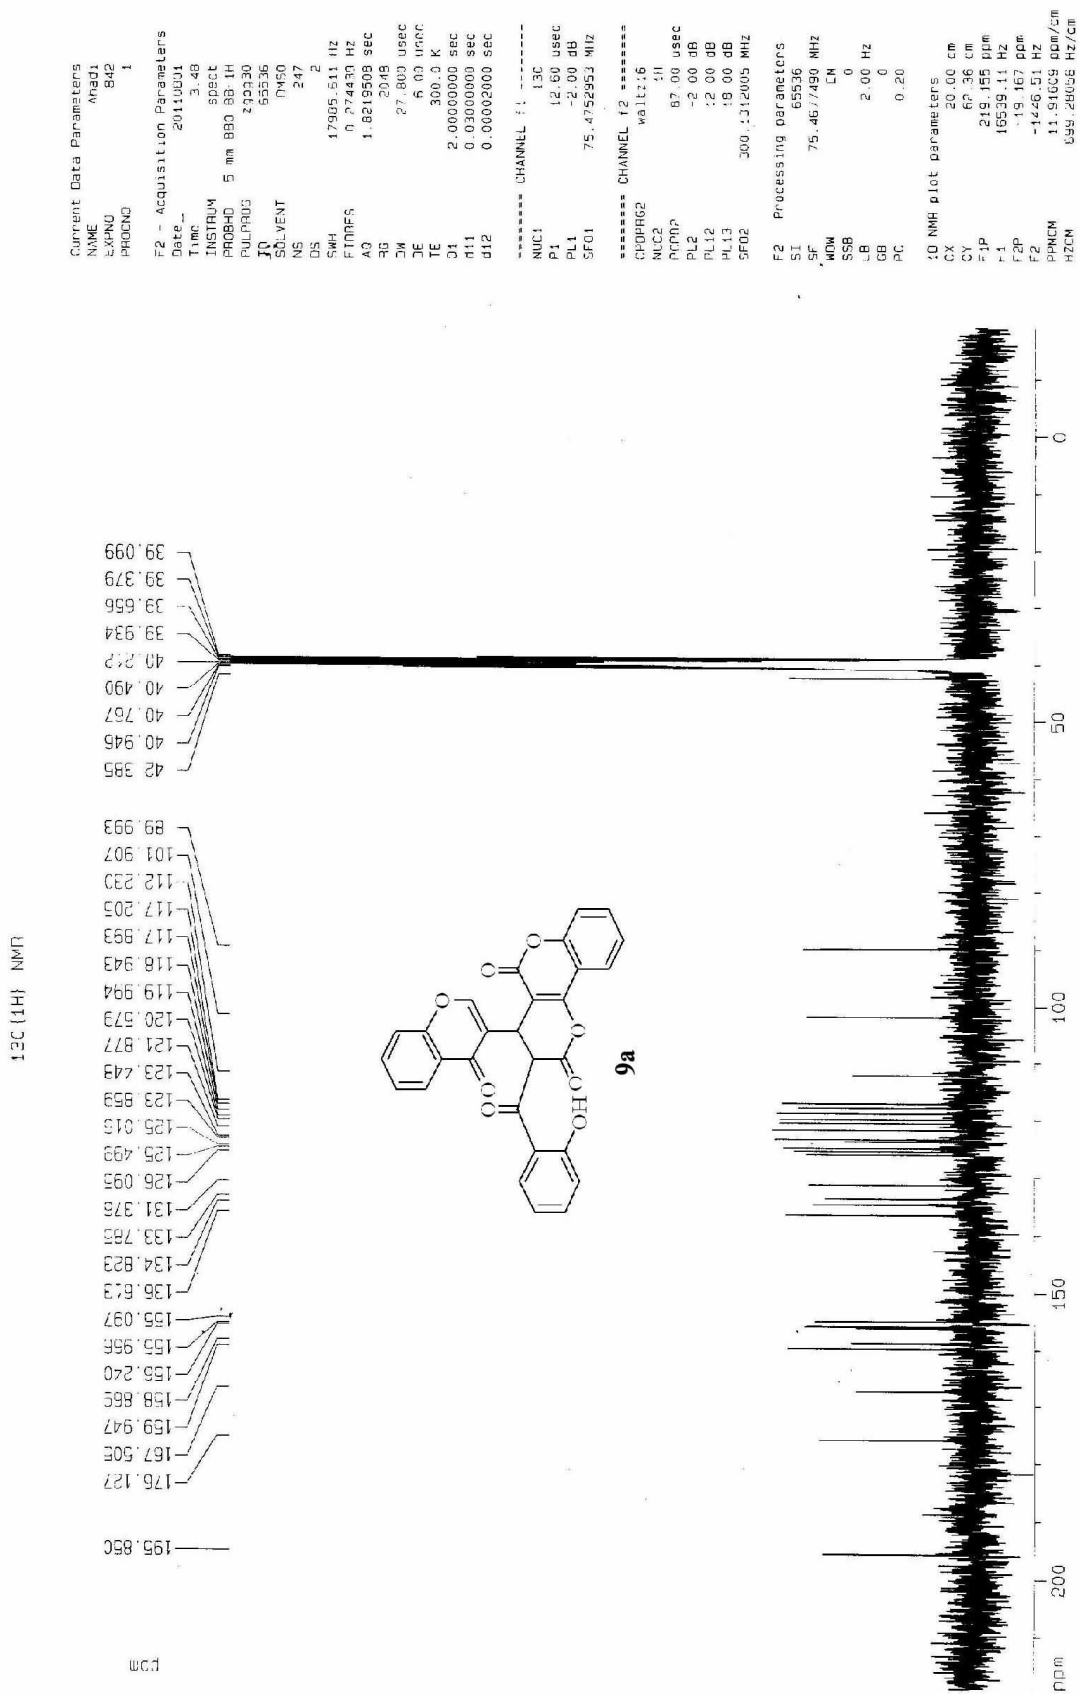

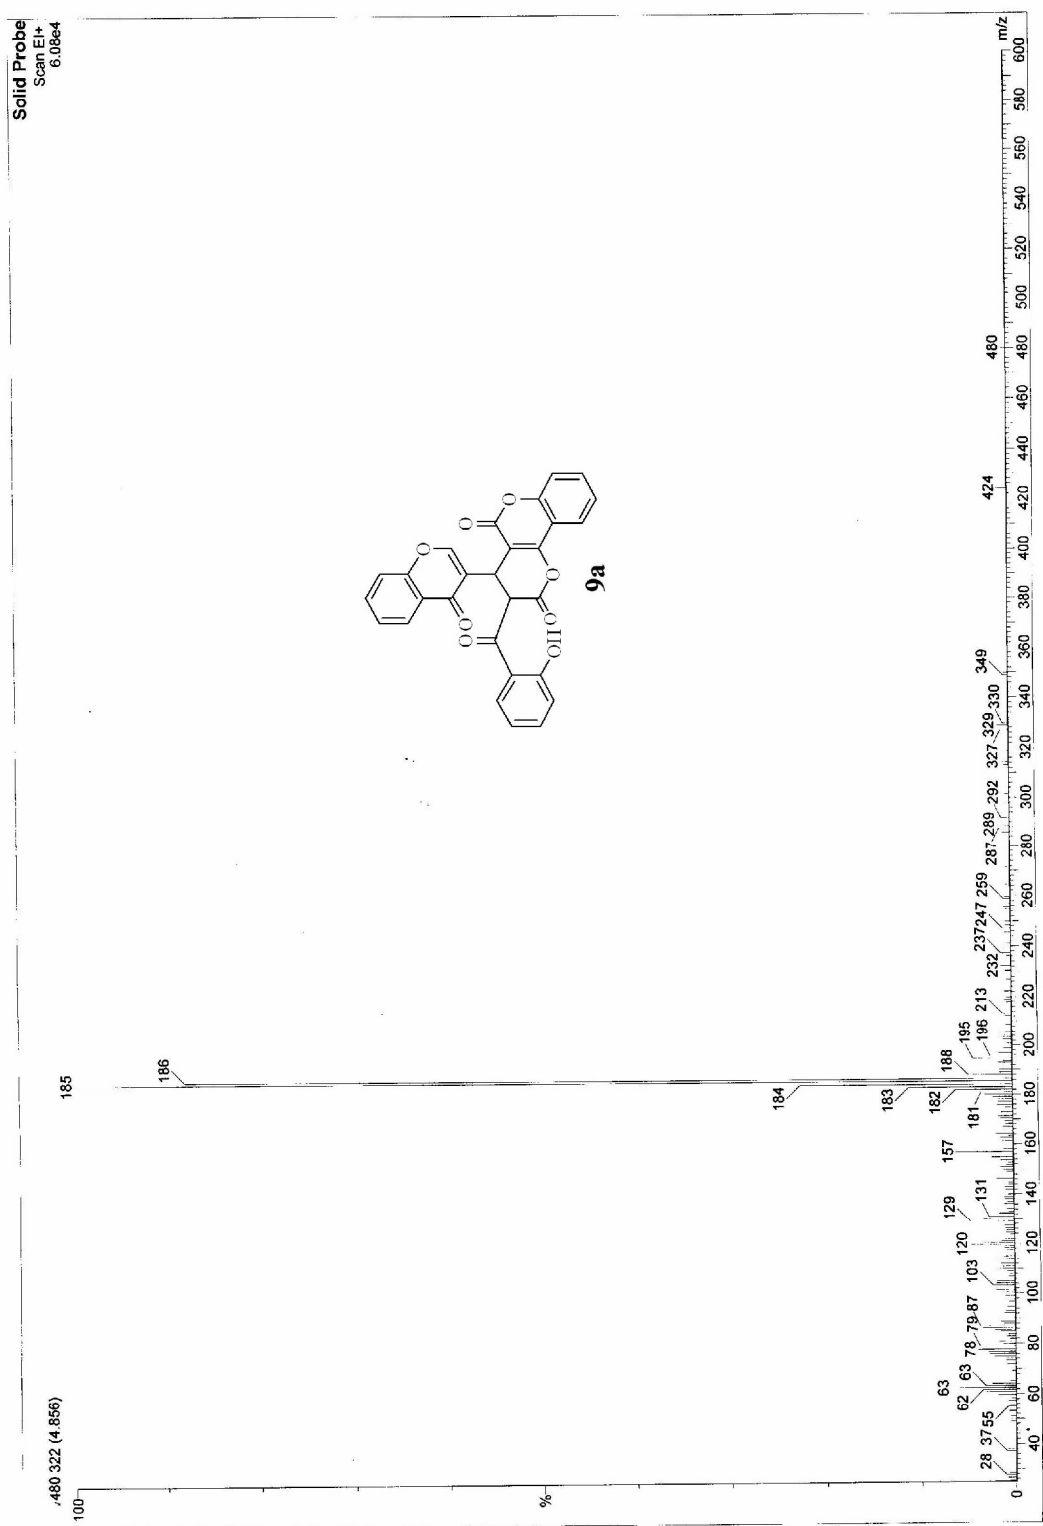

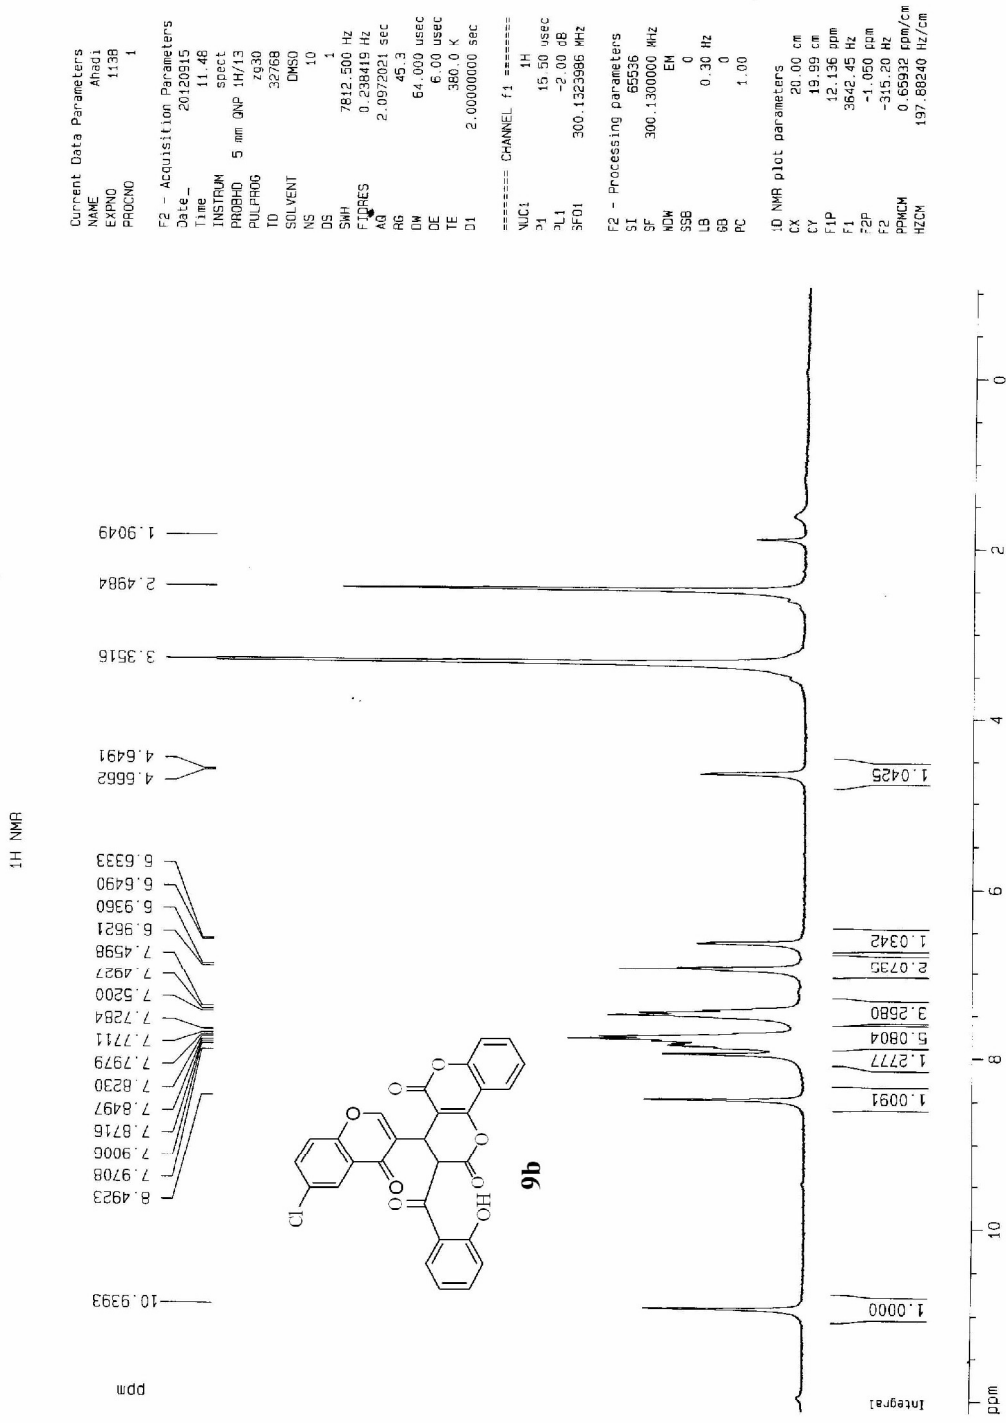

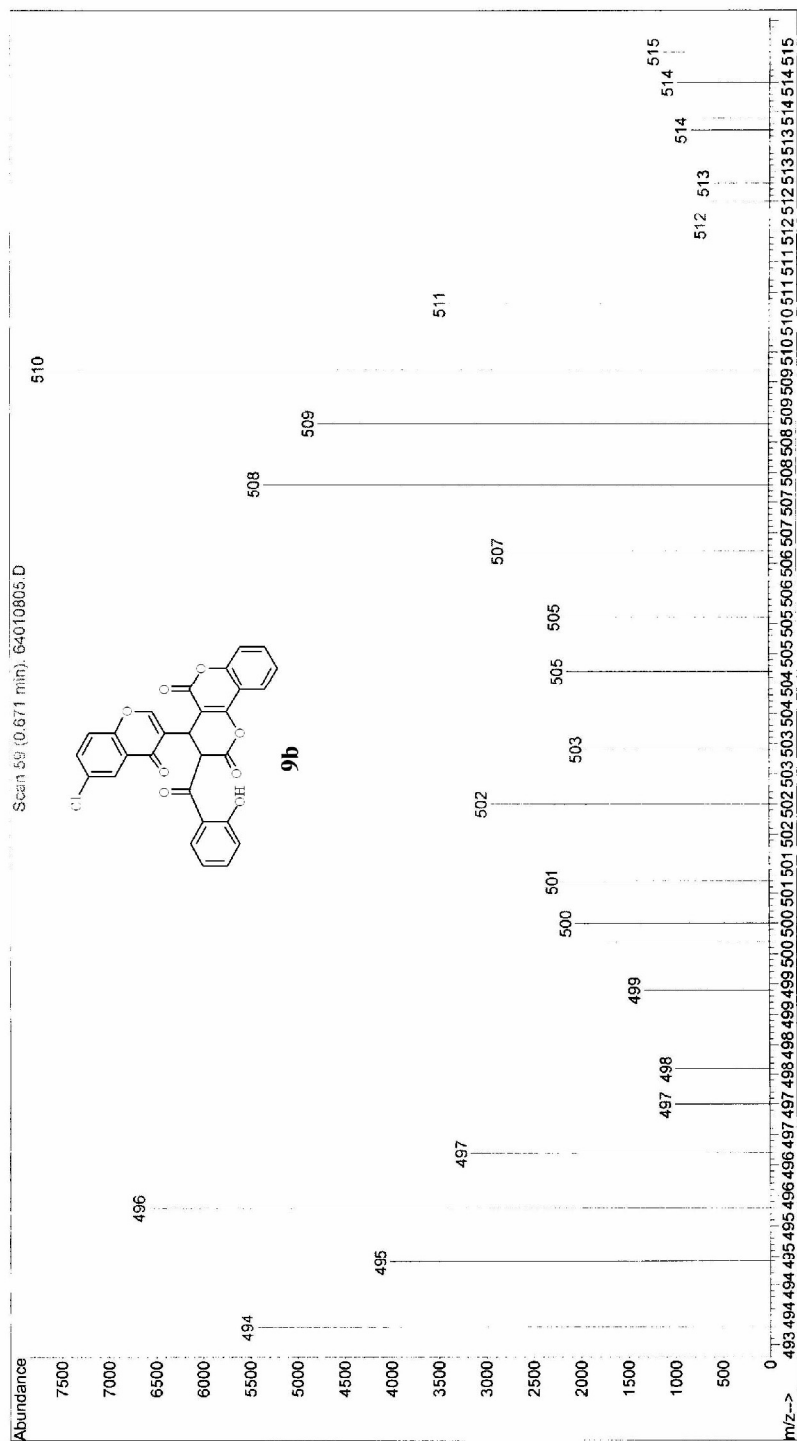

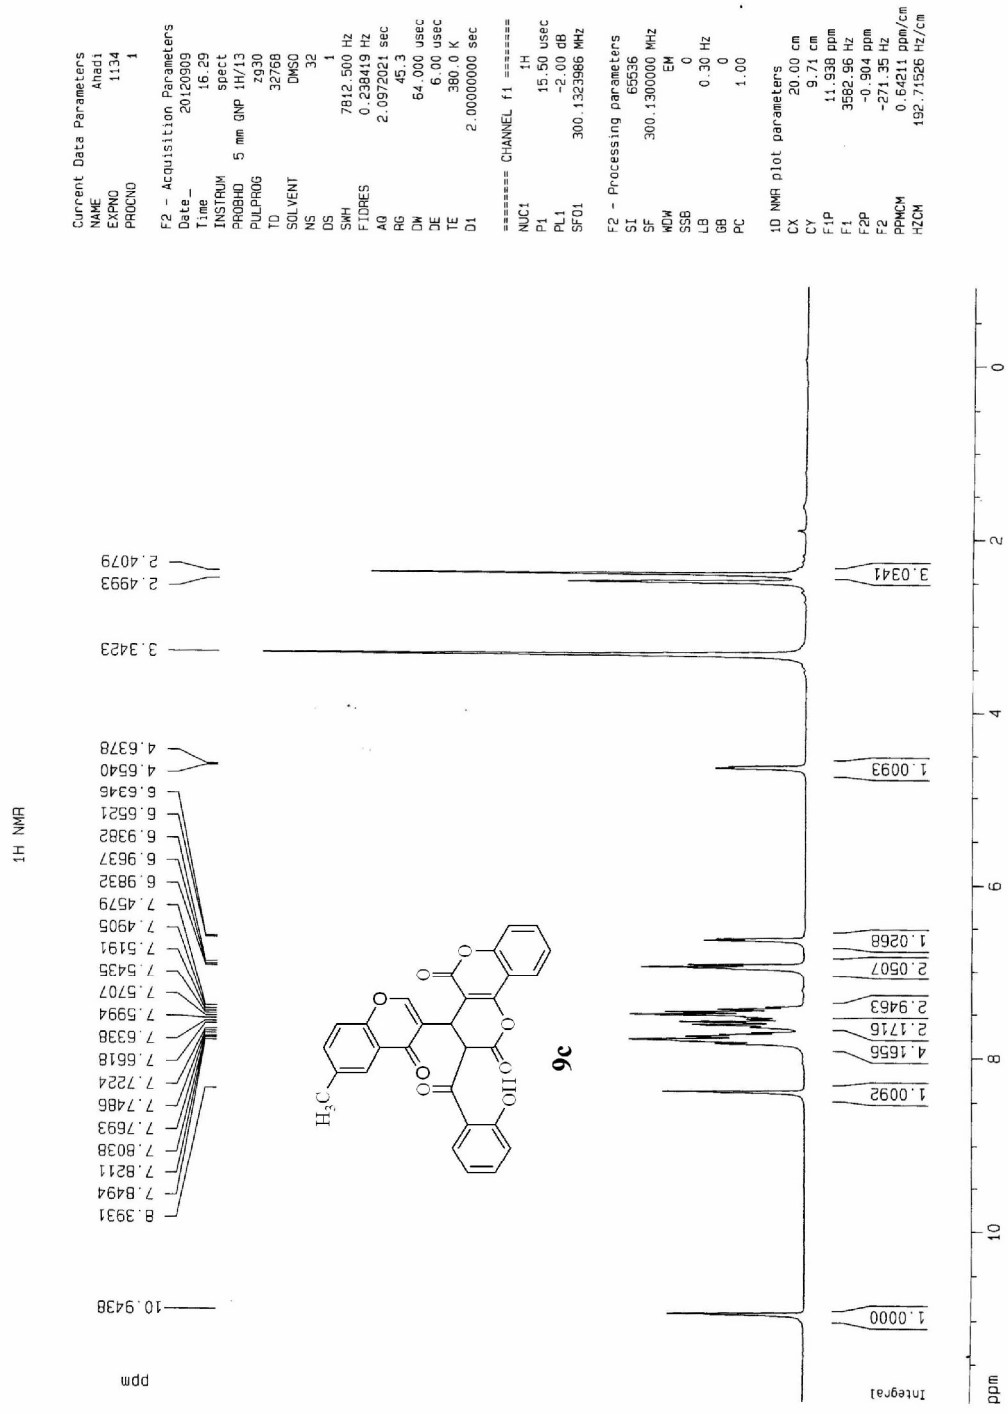

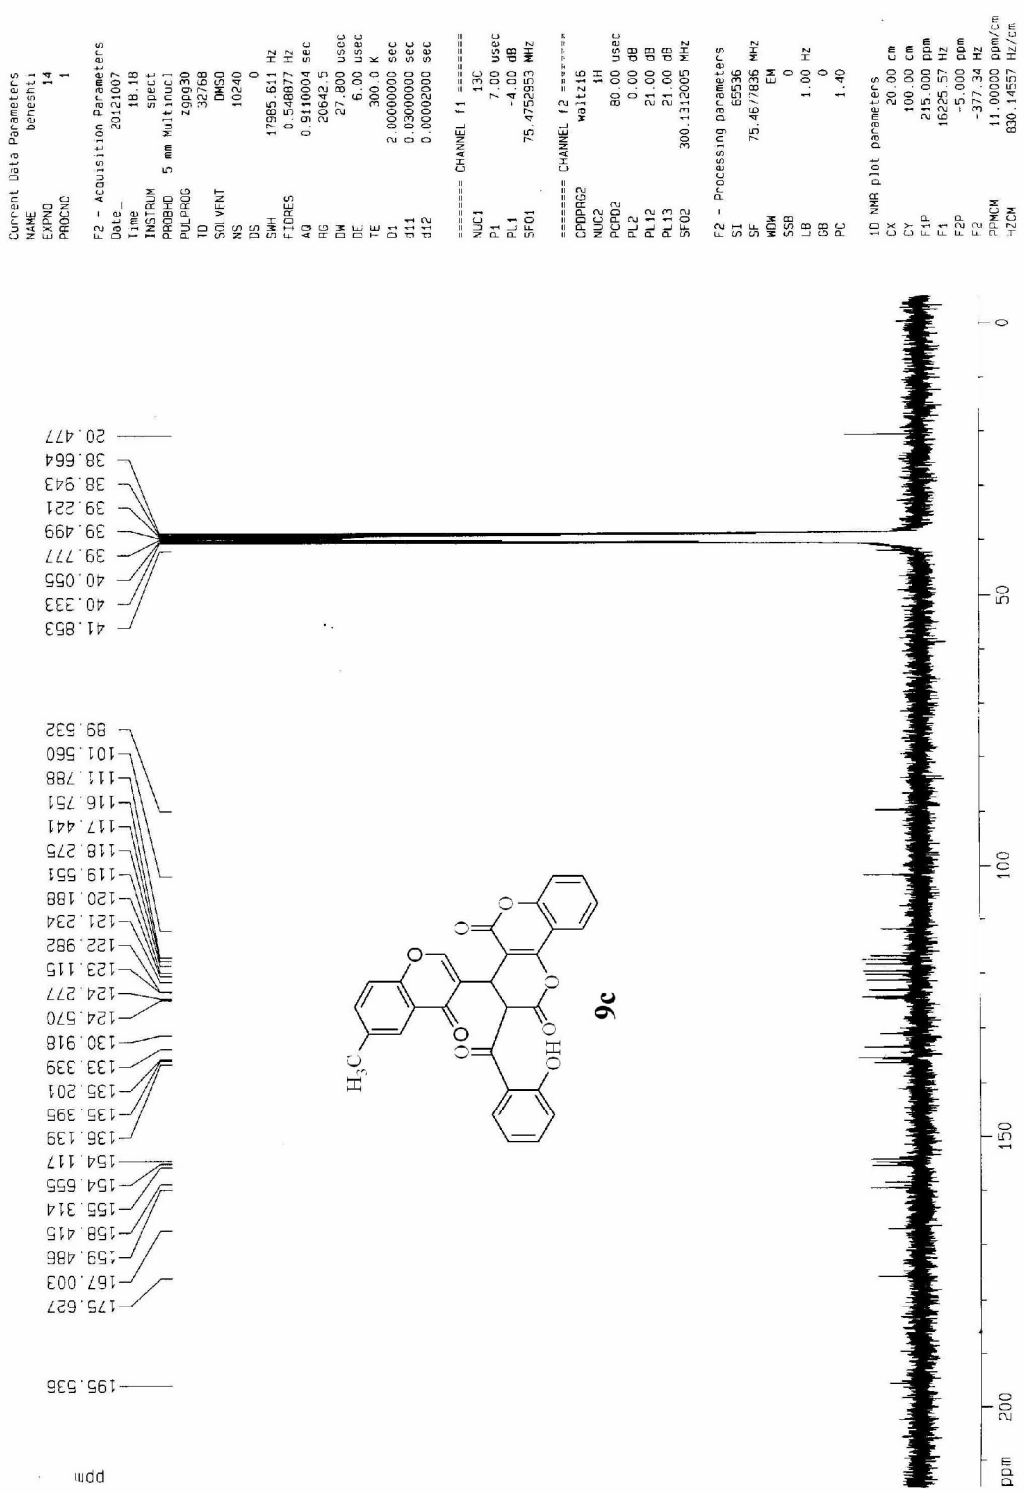

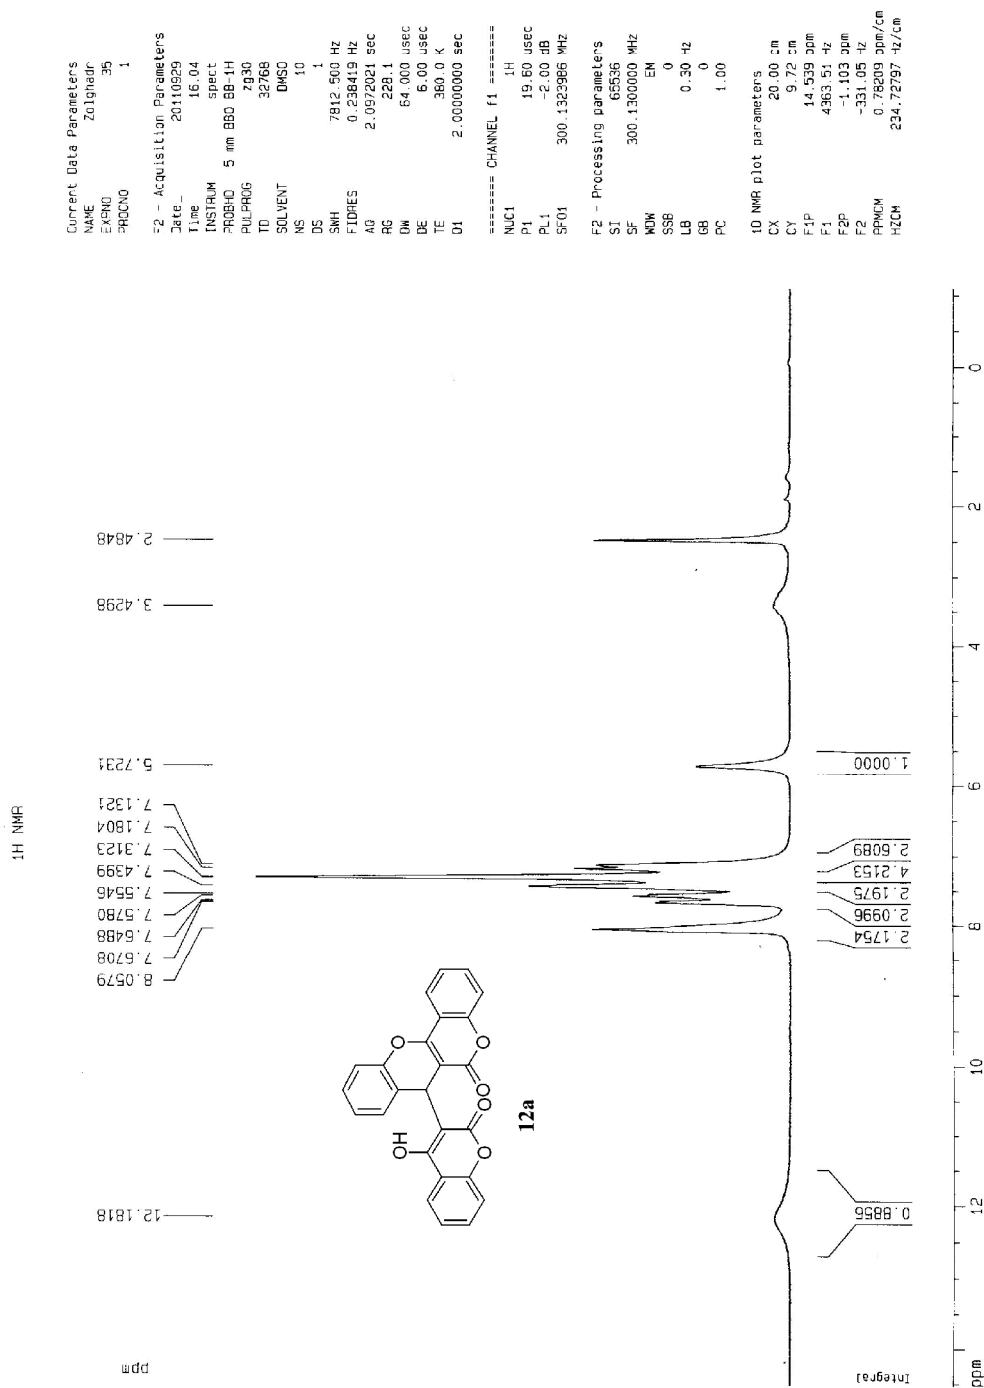

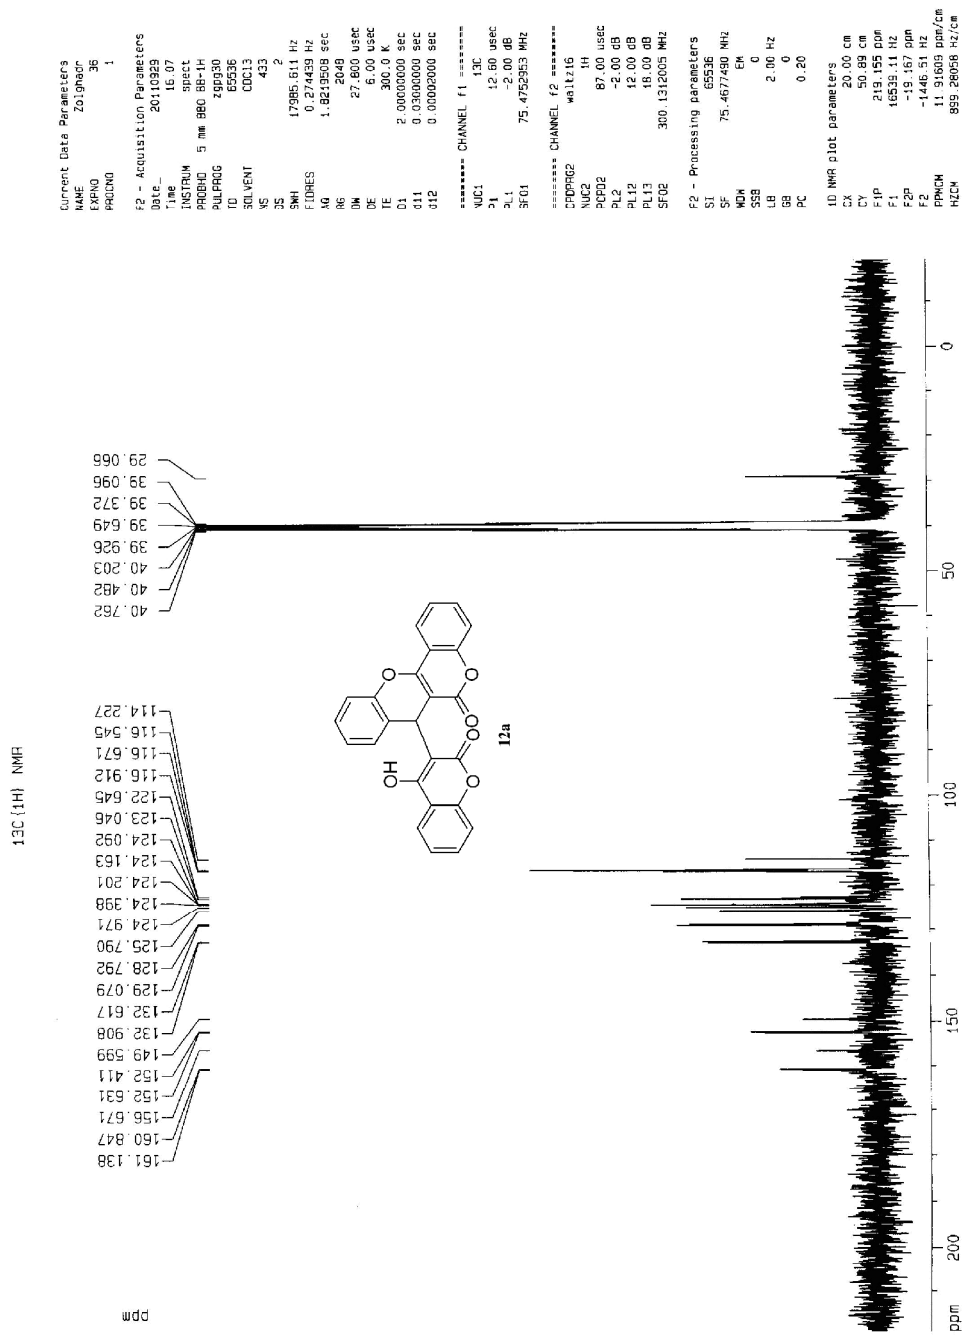

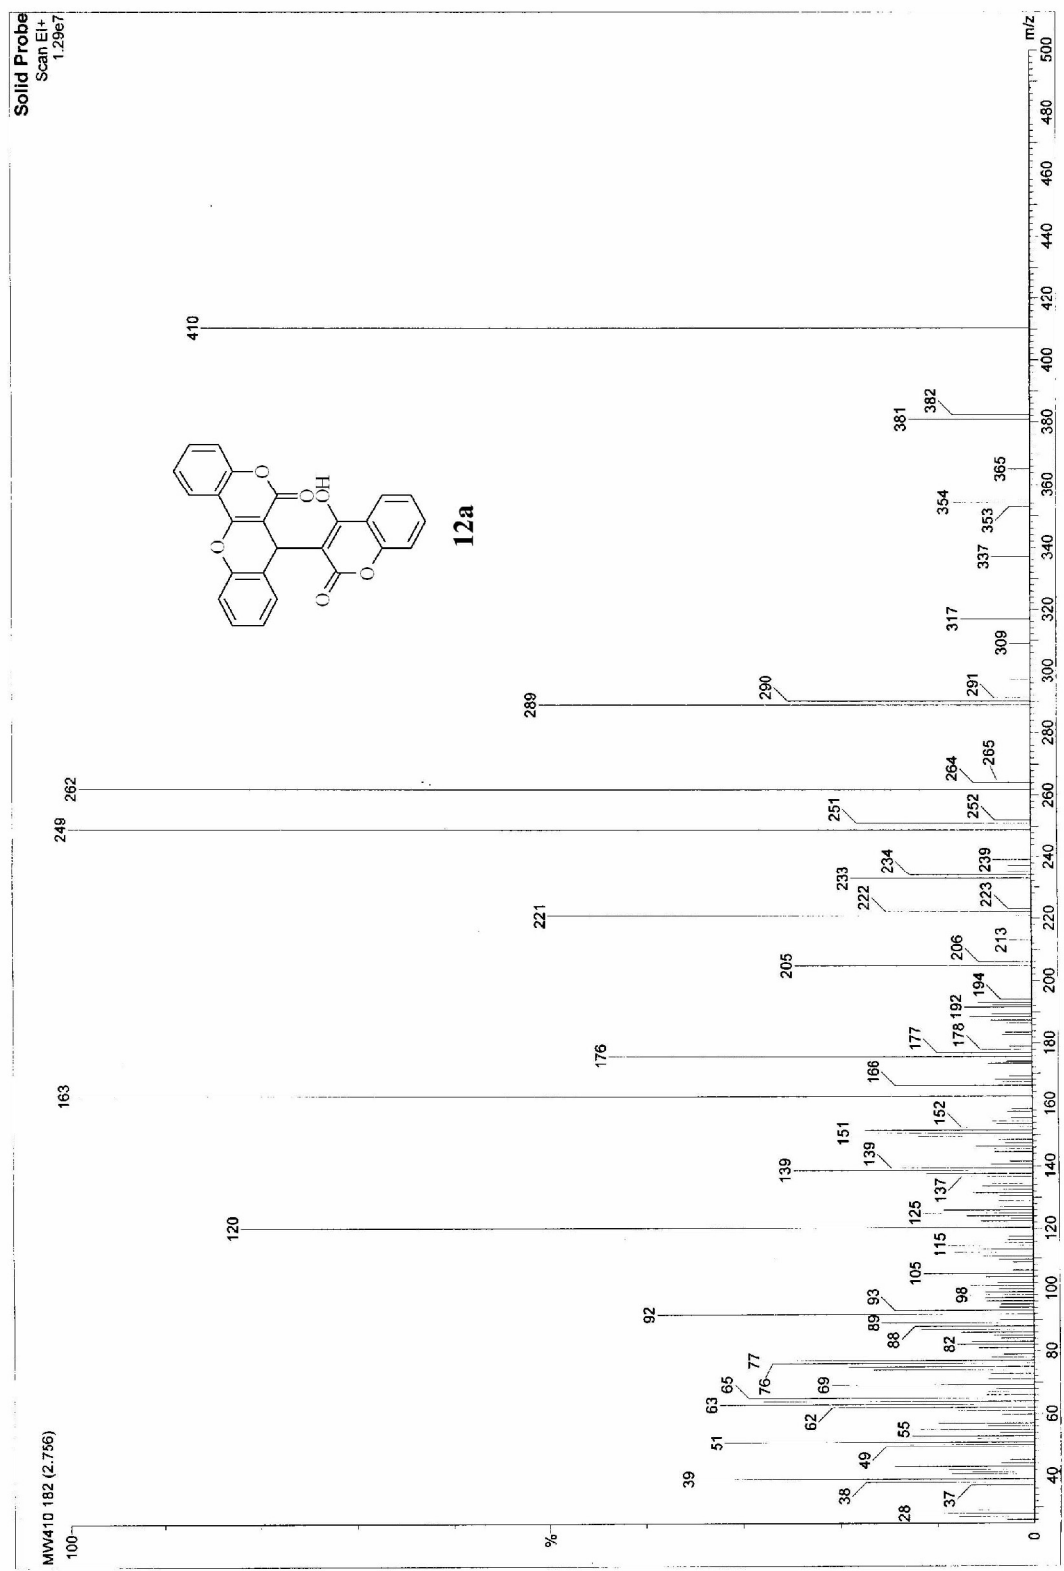

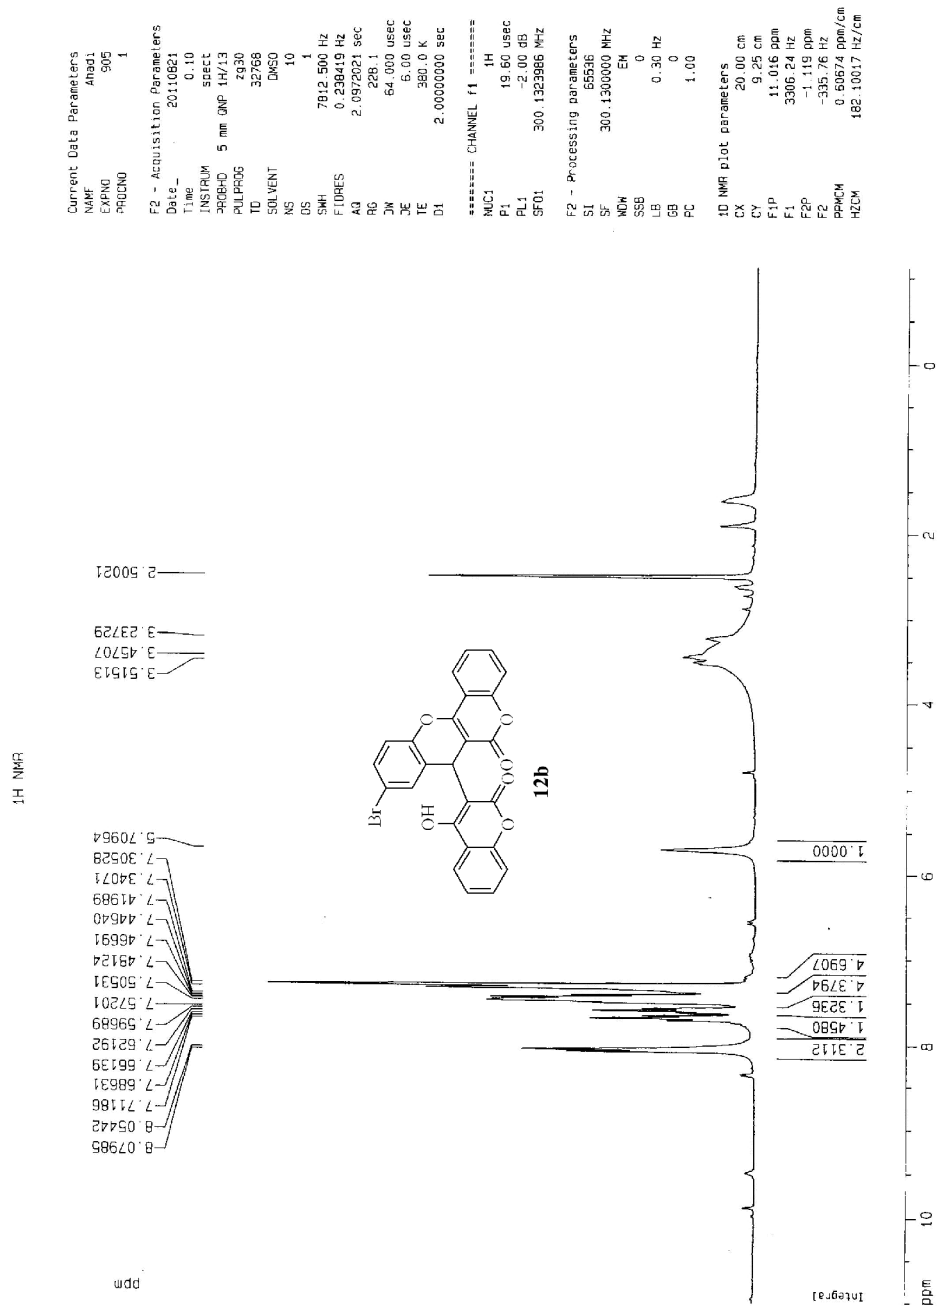

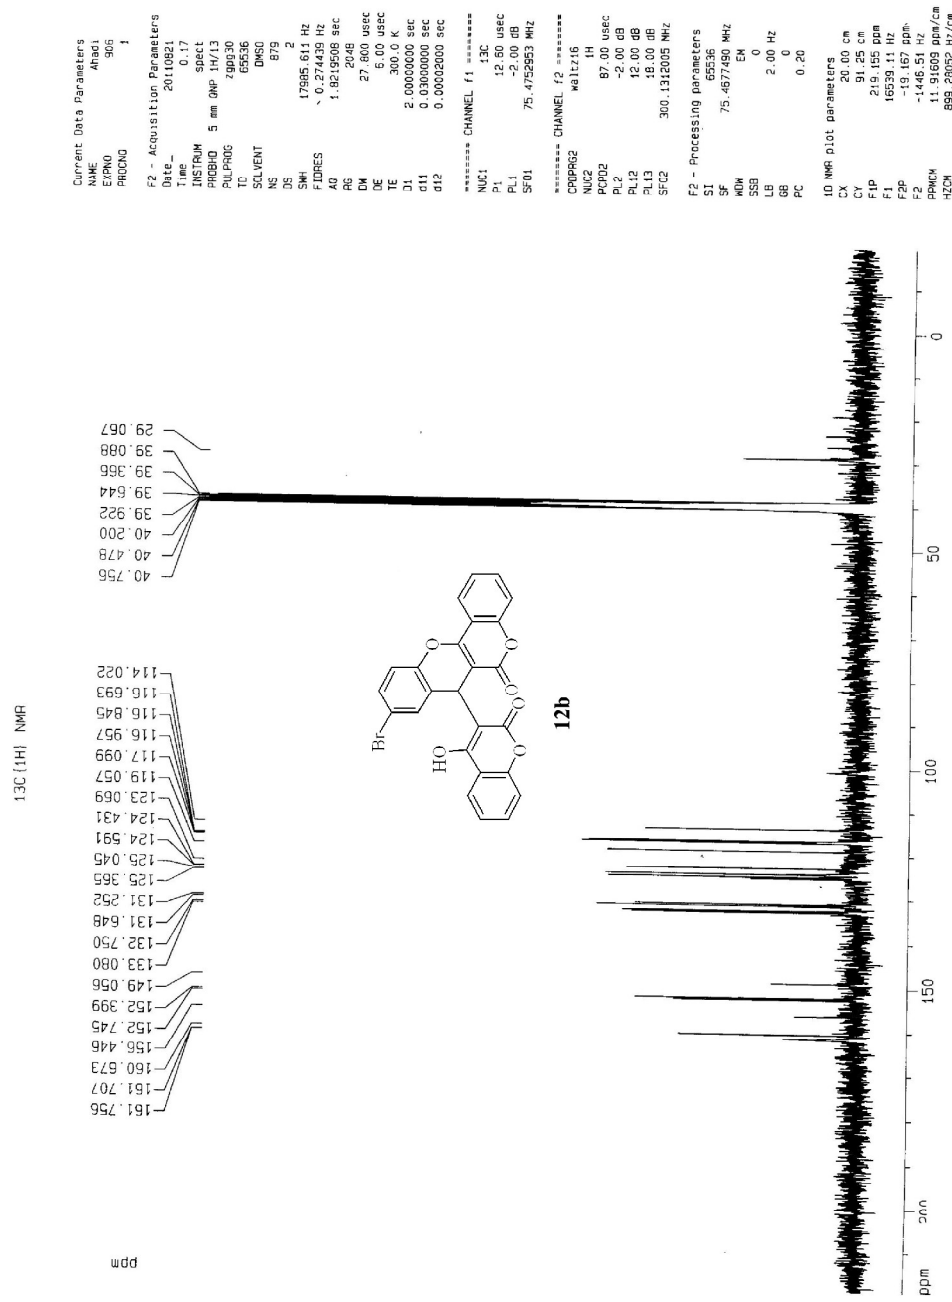

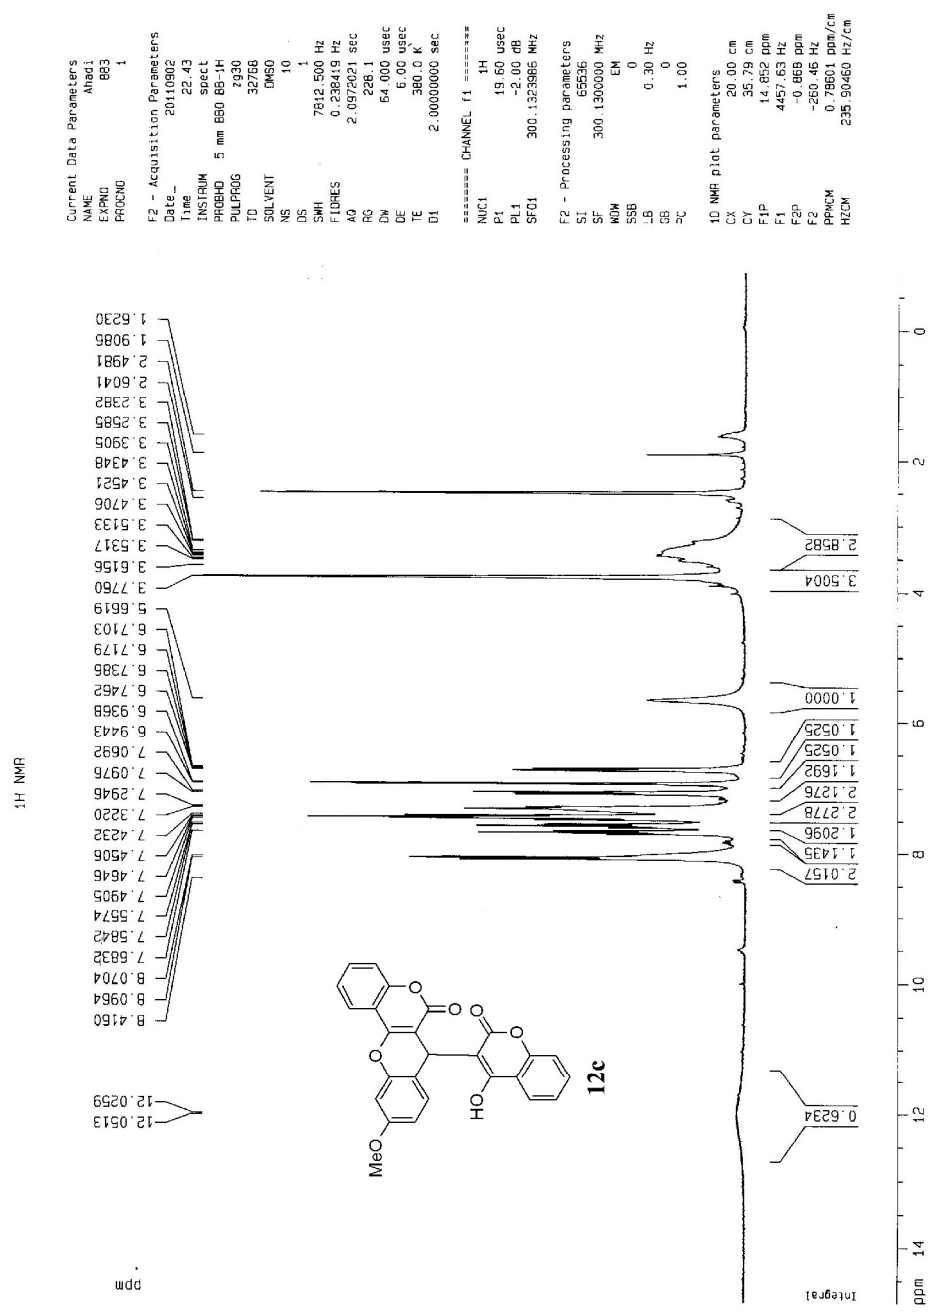

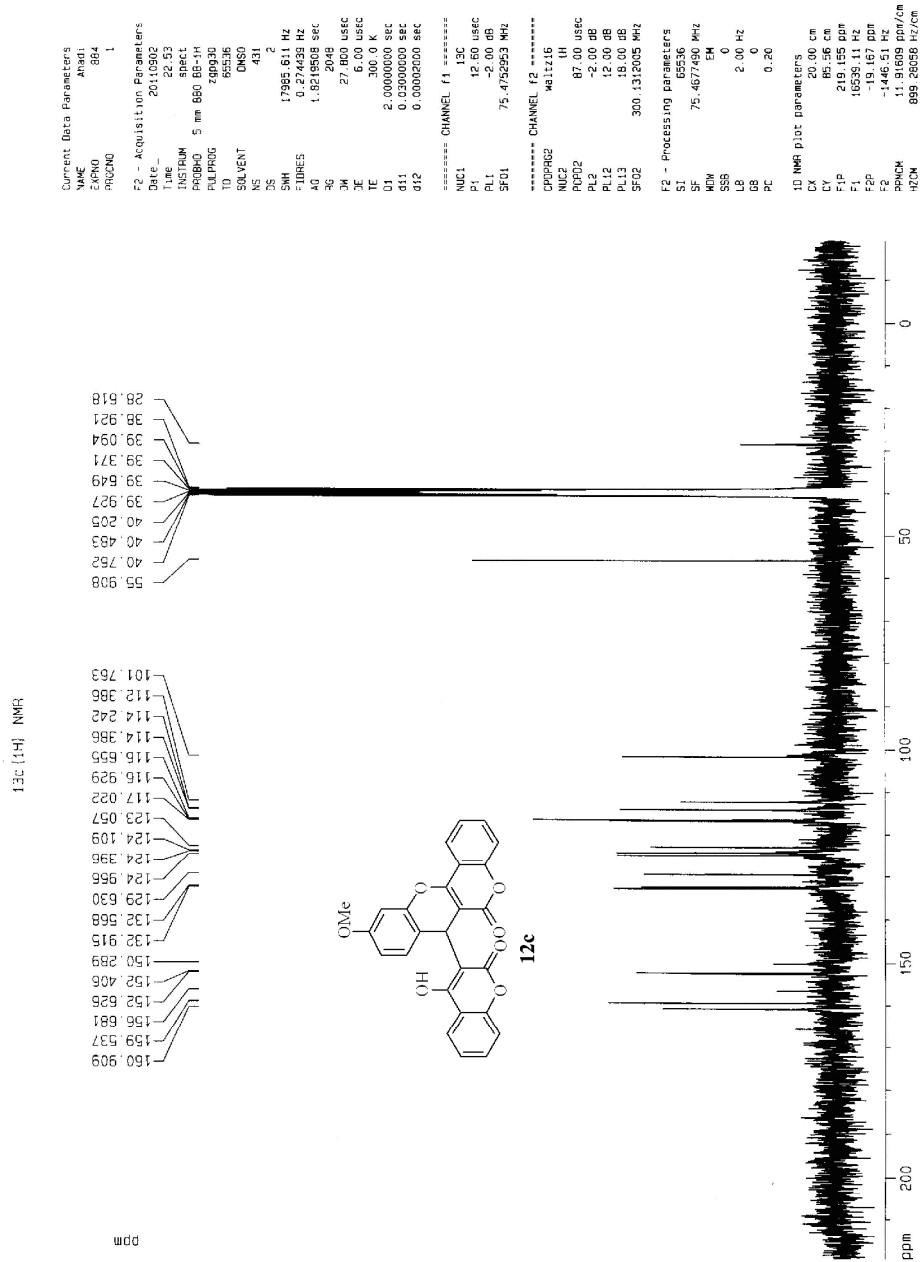

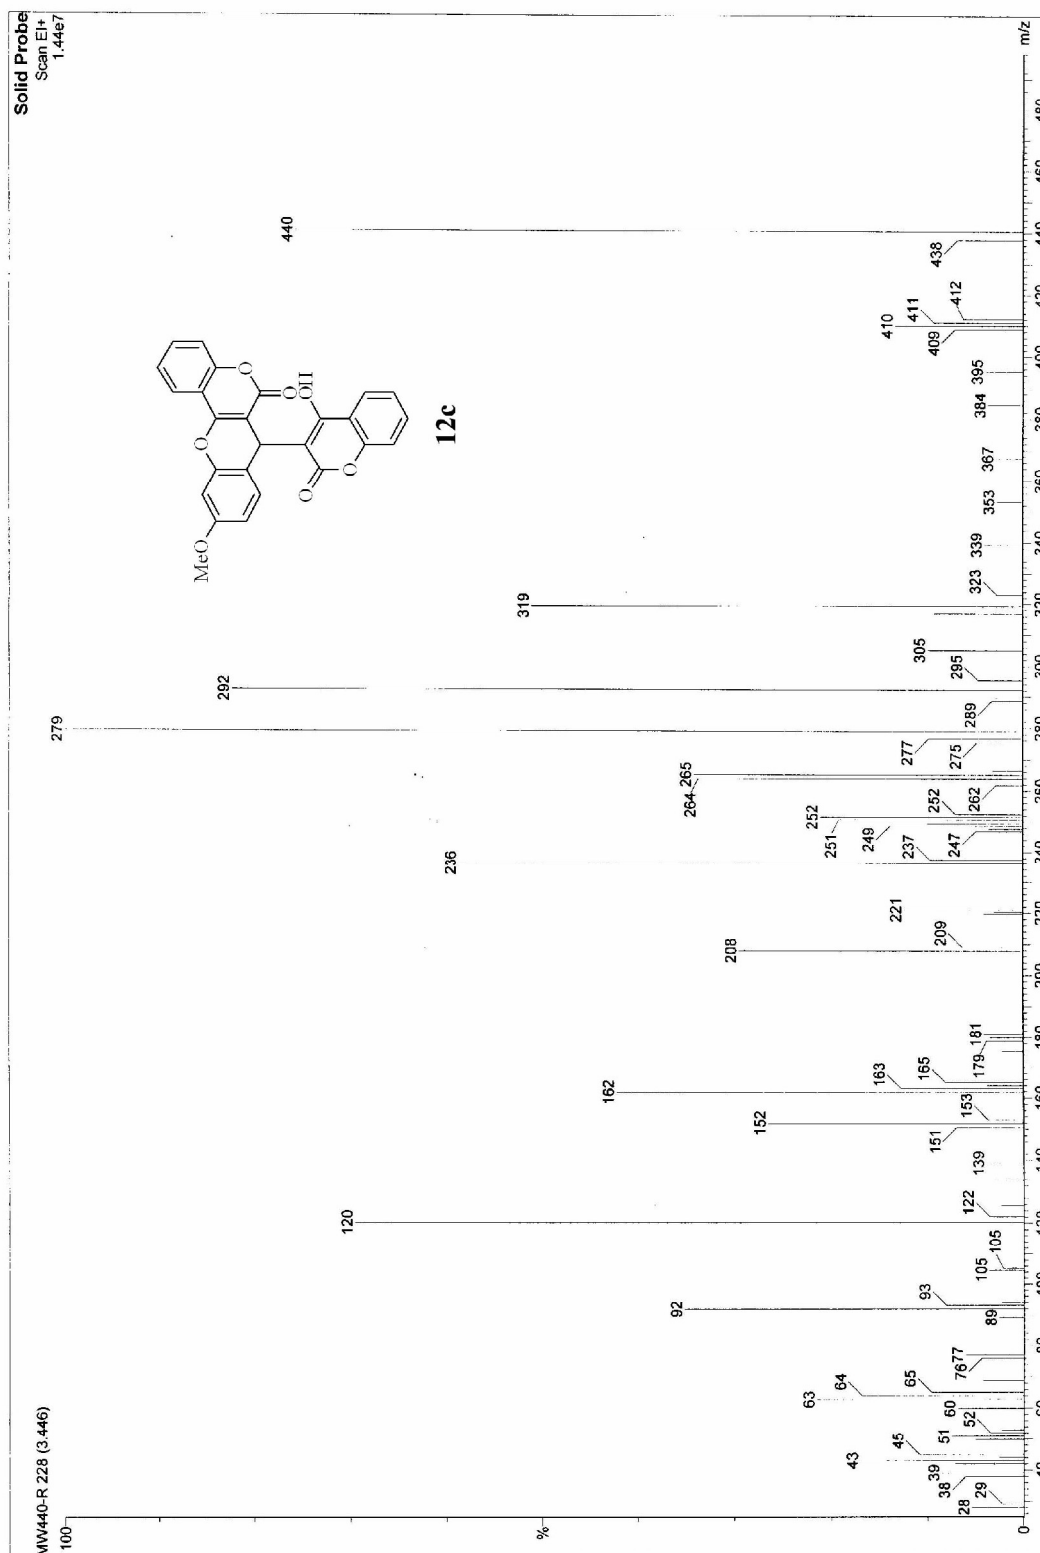

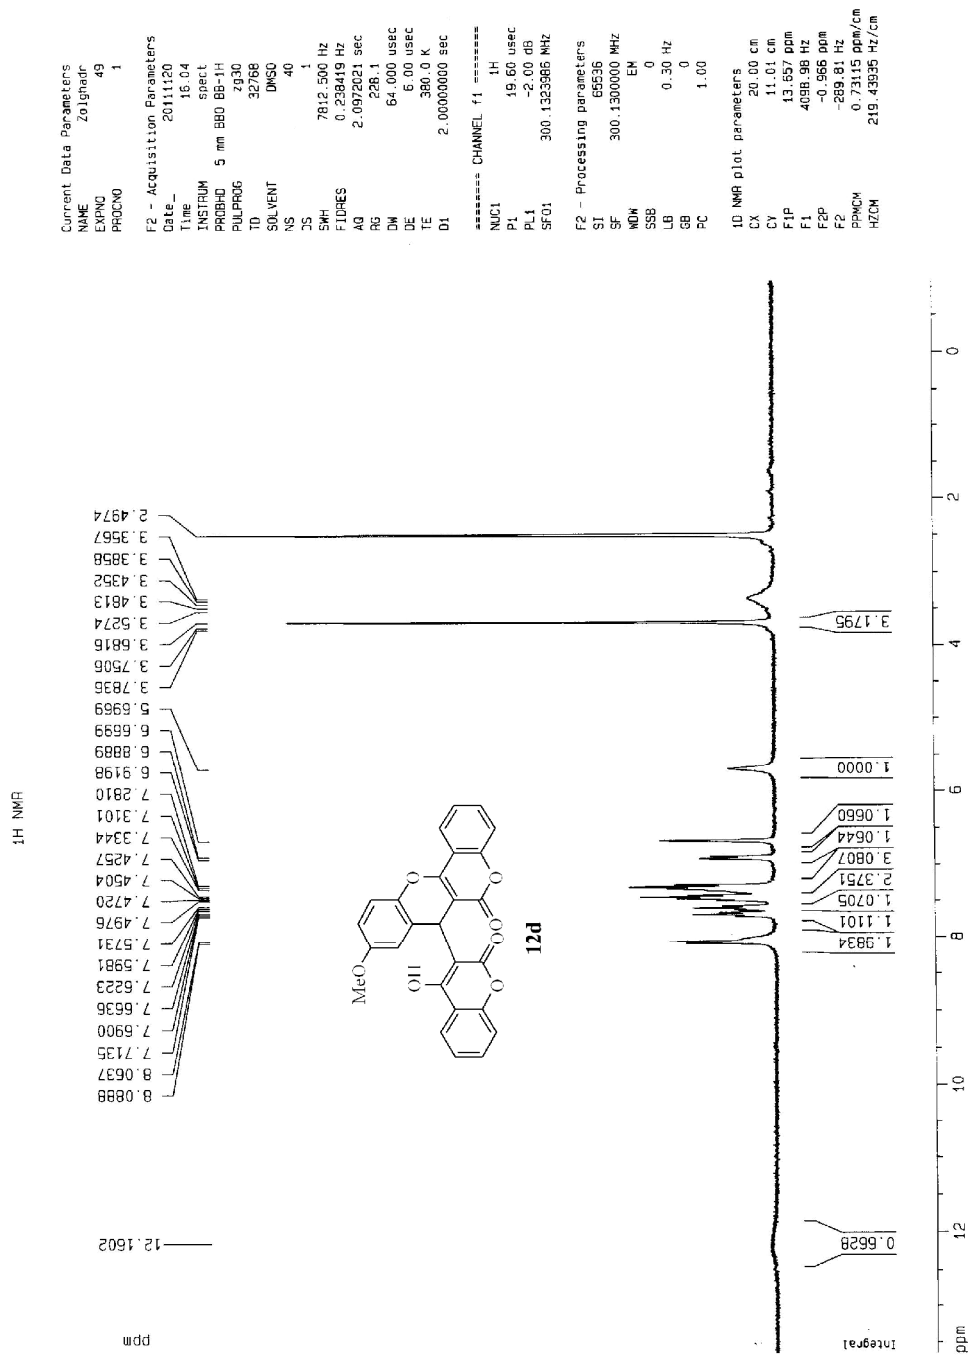

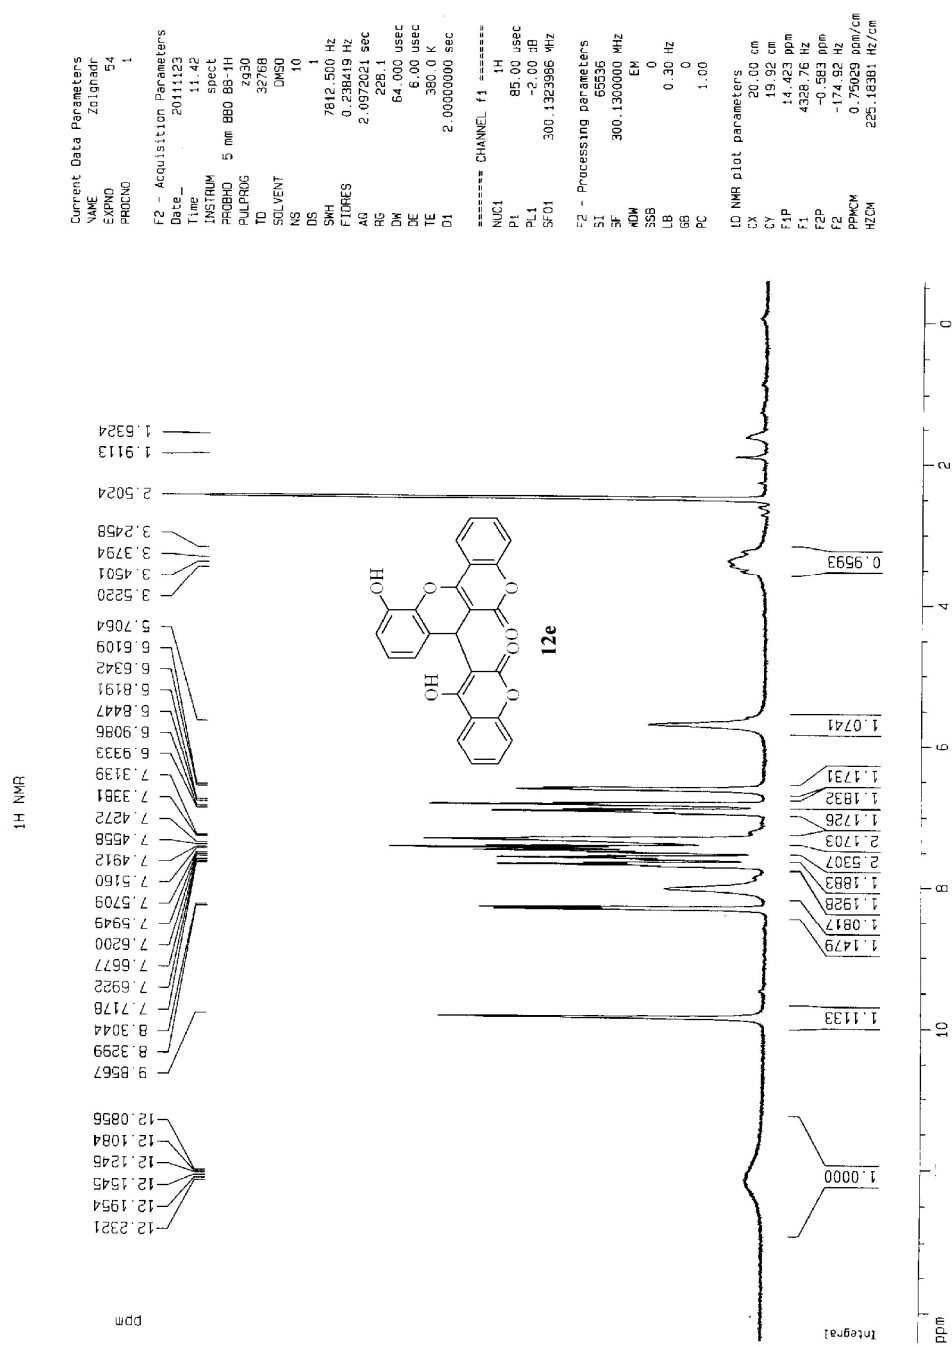

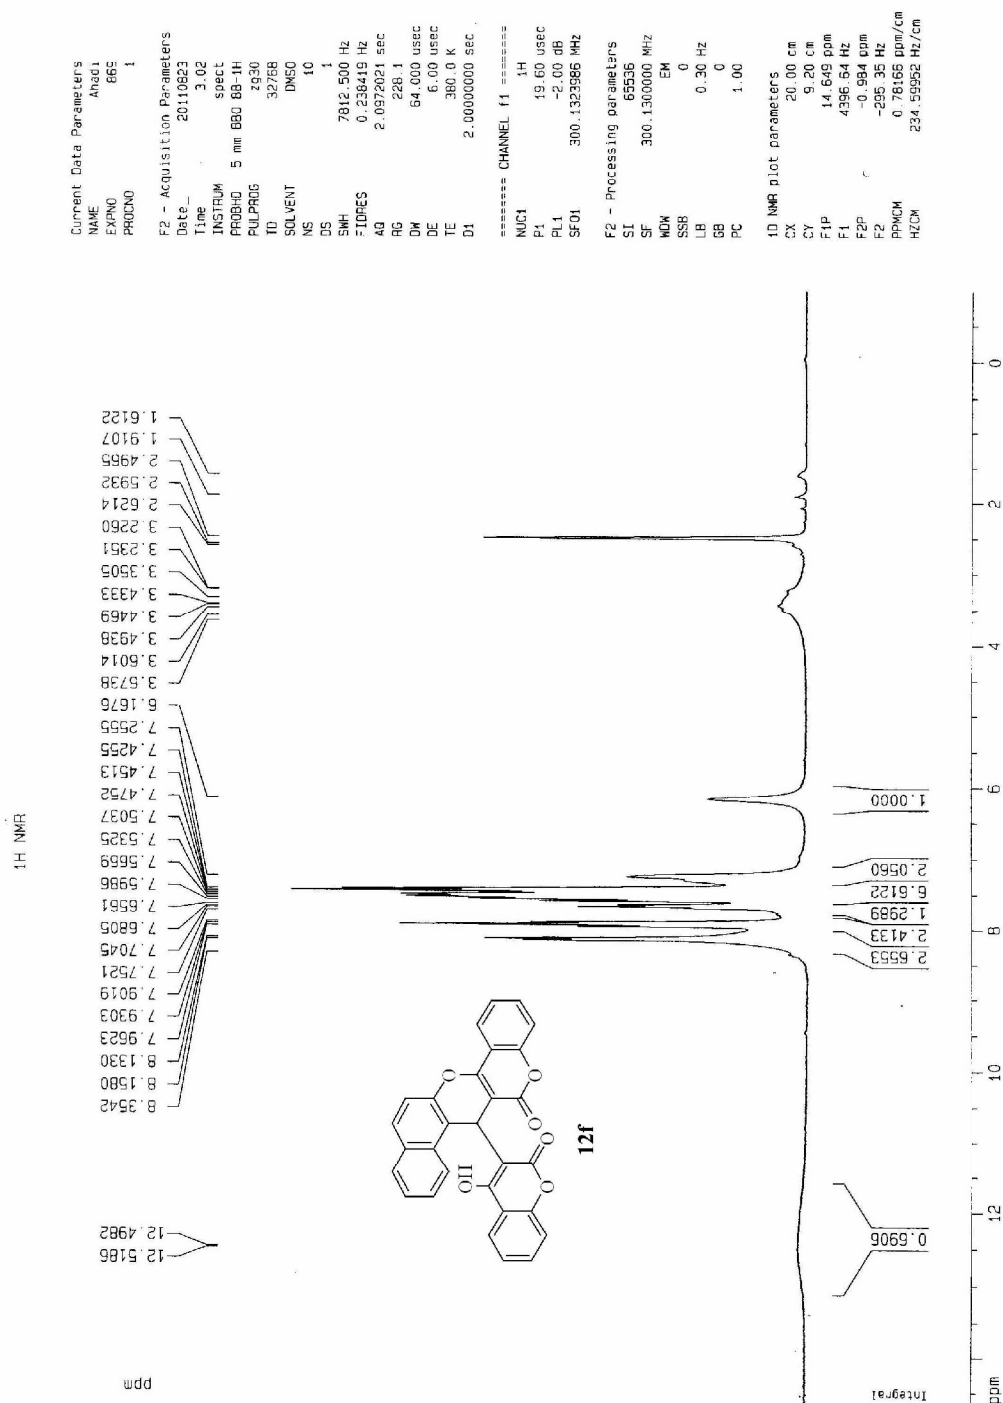

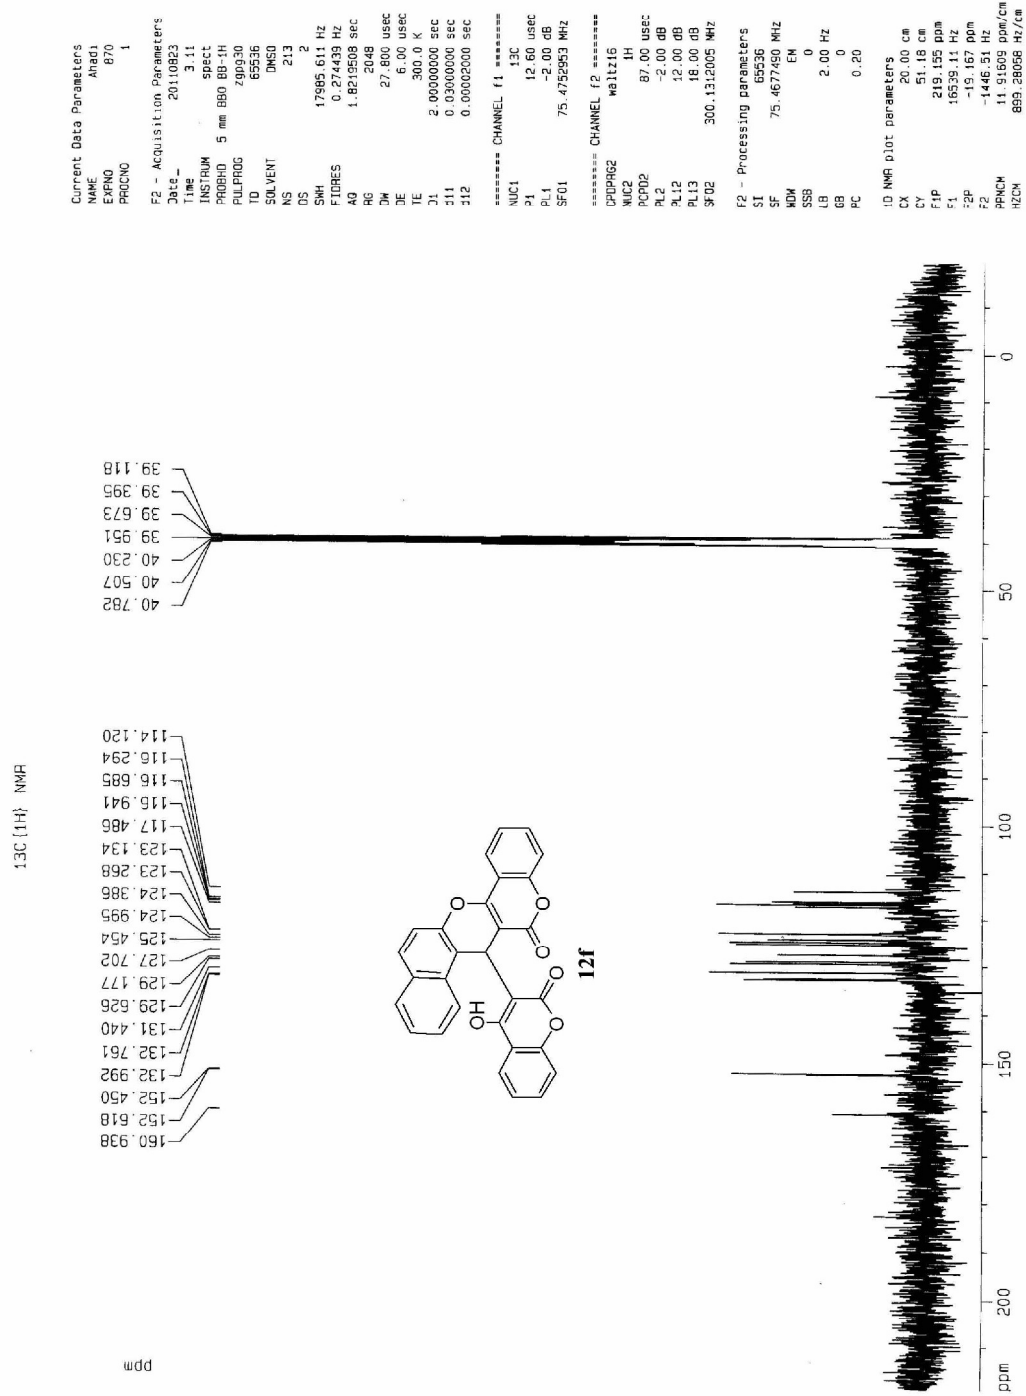

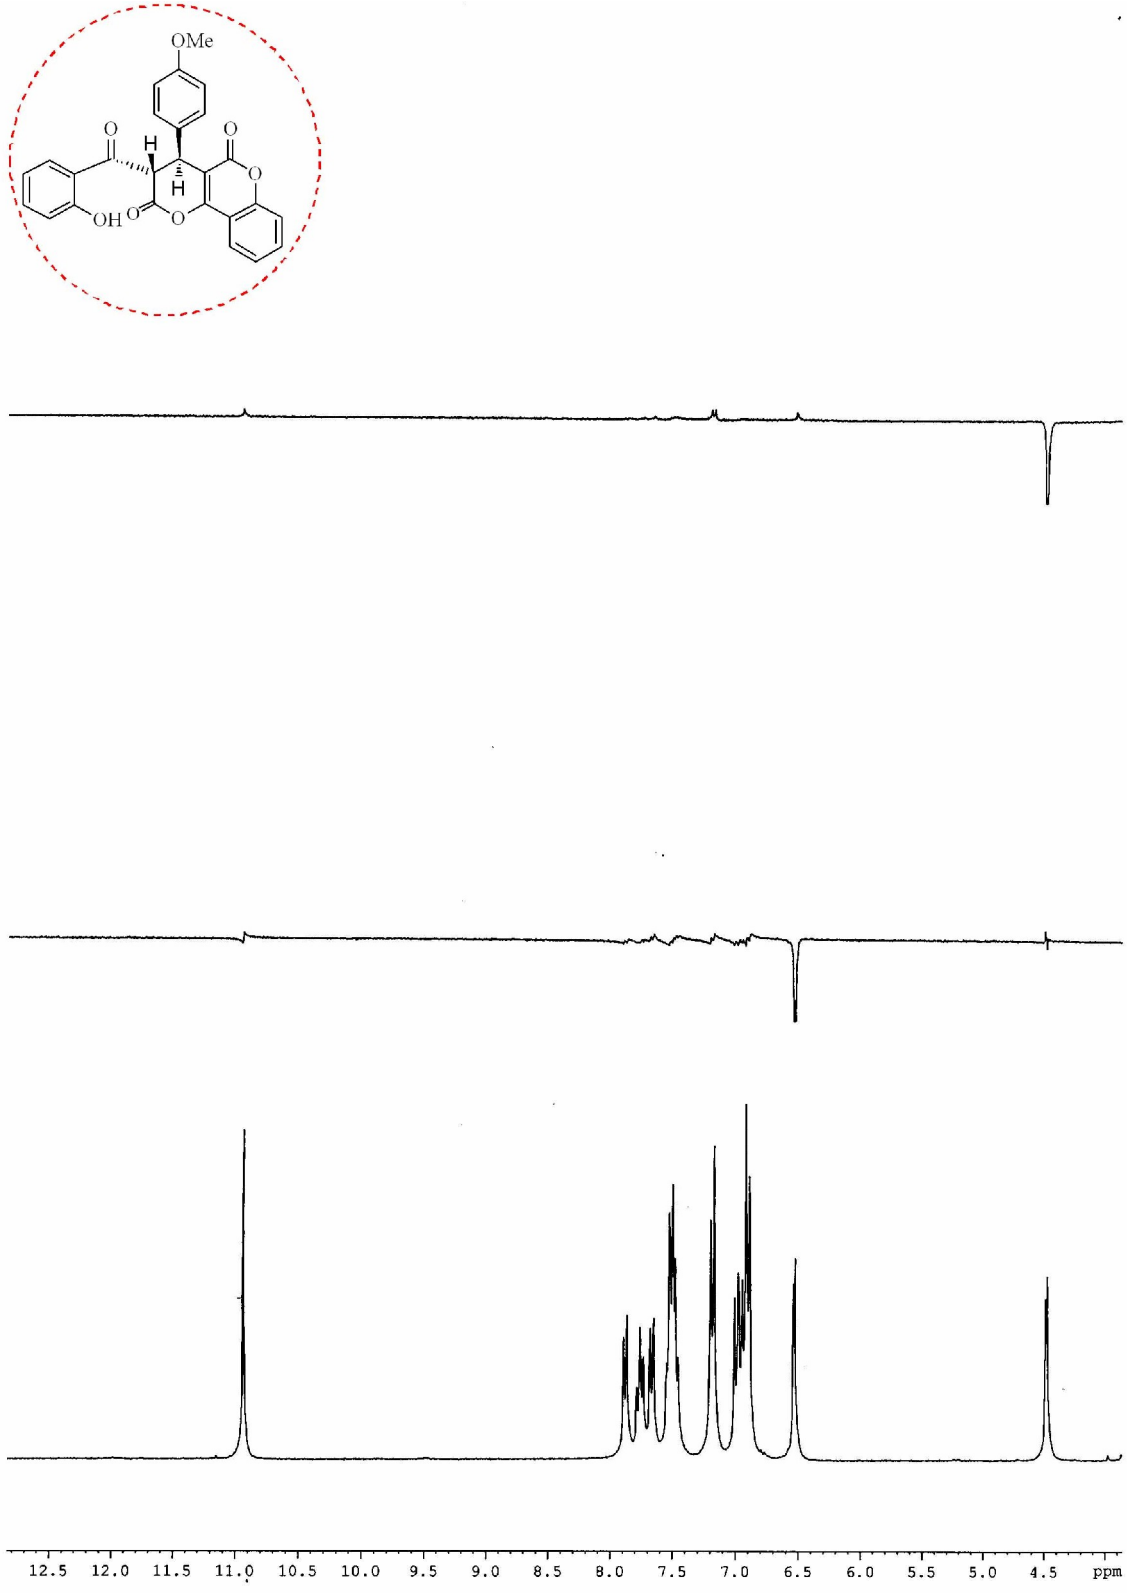

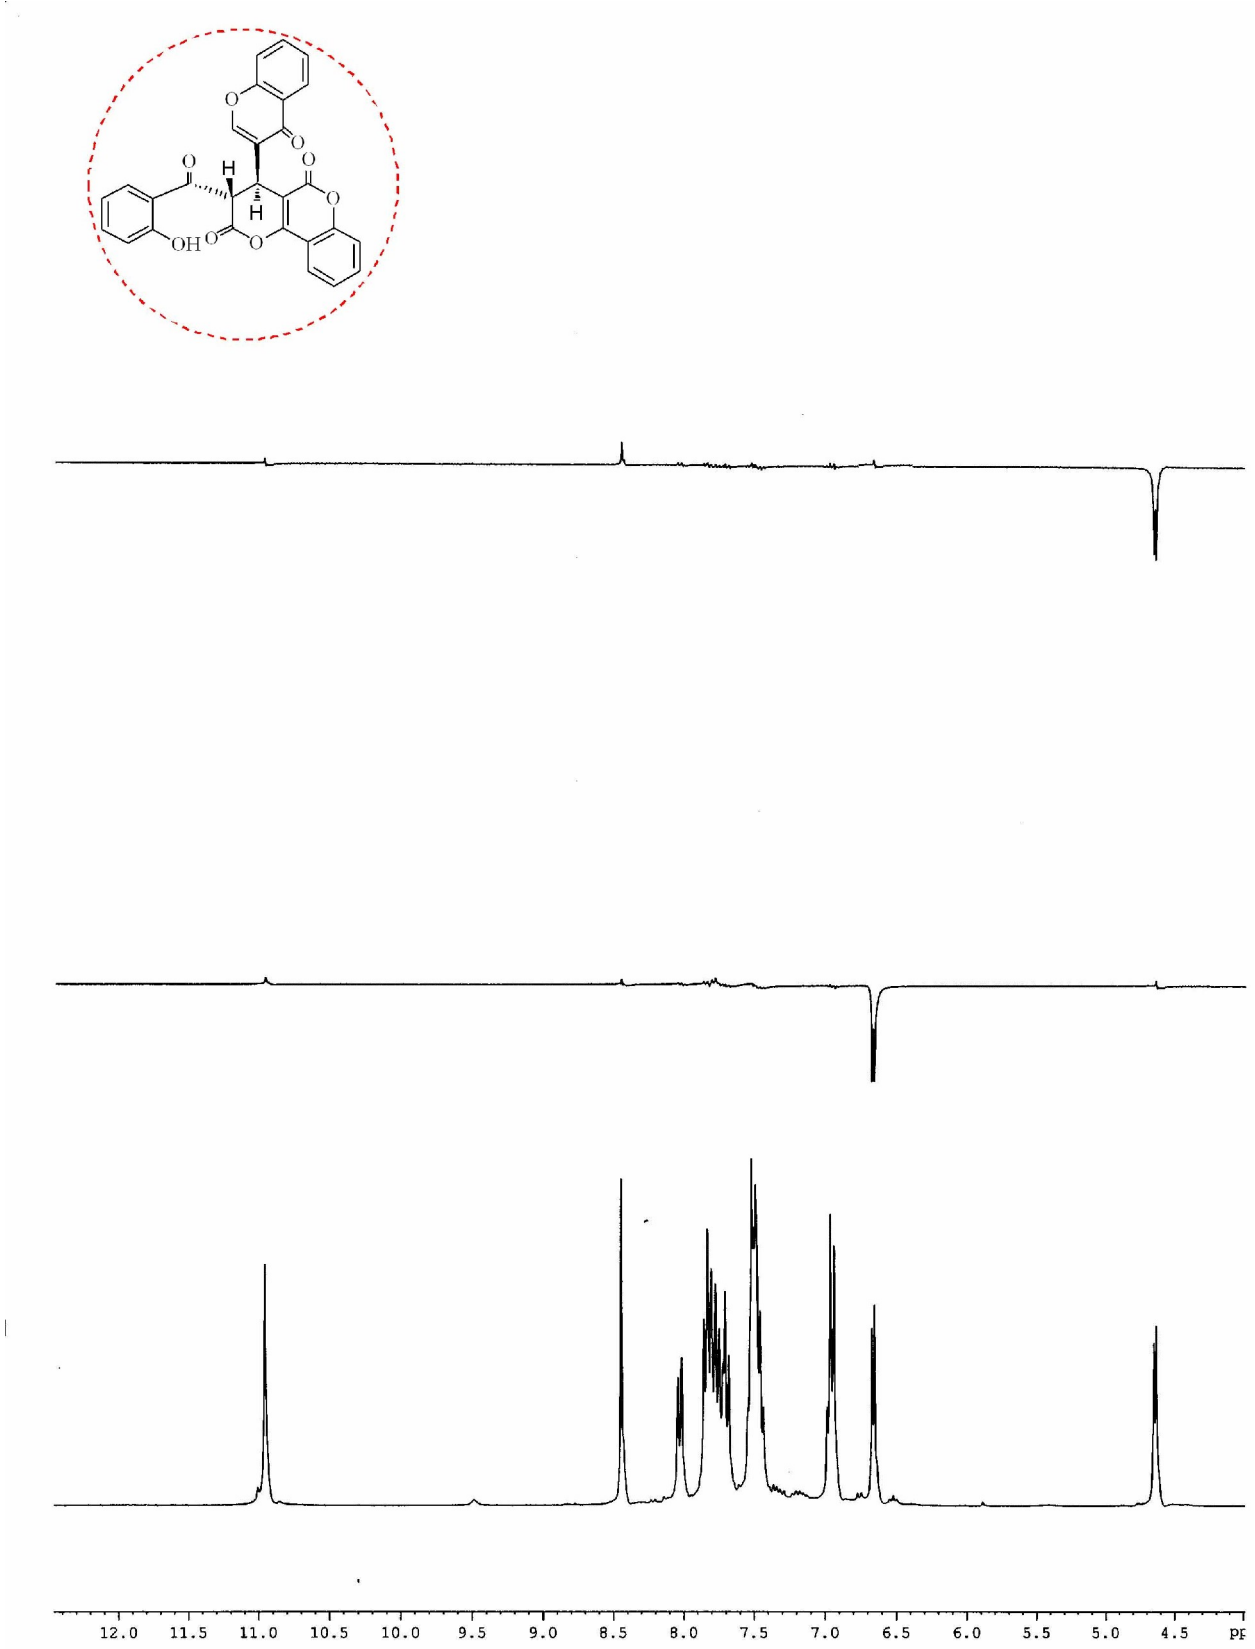

This document was created with Win2PDF available at <http://www.daneprairie.com>.  
The unregistered version of Win2PDF is for evaluation or non-commercial use only.
